# Supplementary material for: Epirubicin for the Treatment of Sepsis and Septic Shock (EPOS-1): study protocol for a randomised, placebo-controlled phase IIa dose-escalation trial
Source: PubMed Central journal article supplement — BMJ Open. 2024 Apr 22;14(4):e075158. doi: 10.1136/bmjopen-2023-075158 (PMC11043739; doi:10.1136/bmjopen-2023-075158), 2024-04-22
Supplement: bmjopen-2023-075158.draft_revisions.pdf [file bmjopen-2023-075158.draft_revisions.pdf]

# BMJ Open

BMJ Open is committed to open peer review. As part of this commitment we make the peer review history of every article we publish publicly available.

When an article is published we post the peer reviewers' comments and the authors' responses online. We also post the versions of the paper that were used during peer review. These are the versions that the peer review comments apply to.

The versions of the paper that follow are the versions that were submitted during the peer review process. They are not the versions of record or the final published versions. They should not be cited or distributed as the published version of this manuscript.

BMJ Open is an open access journal and the full, final, typeset and author-corrected version of record of the manuscript is available on our site with no access controls, subscription charges or pay-per-view fees (<http://bmjopen.bmj.com>).

If you have any questions on BMJ Open's open peer review process please email [info.bmjopen@bmj.com](mailto:info.bmjopen@bmj.com)

# BMJ Open

## Epirubicin for the Treatment of Sepsis & Septic Shock (EPOS-1): study protocol for a randomized, placebo-controlled Phase IIa dose escalation trial

|                               |                                                                                                                                                                                                                                                                                                                                                                                                                                                                                                                                                                                                                                                                                                                                                                                                                                                                                                                                                                                                                                                                                                                                                                                                                                                                                                                                                                                    |
|-------------------------------|------------------------------------------------------------------------------------------------------------------------------------------------------------------------------------------------------------------------------------------------------------------------------------------------------------------------------------------------------------------------------------------------------------------------------------------------------------------------------------------------------------------------------------------------------------------------------------------------------------------------------------------------------------------------------------------------------------------------------------------------------------------------------------------------------------------------------------------------------------------------------------------------------------------------------------------------------------------------------------------------------------------------------------------------------------------------------------------------------------------------------------------------------------------------------------------------------------------------------------------------------------------------------------------------------------------------------------------------------------------------------------|
| Journal:                      | <i>BMJ Open</i>                                                                                                                                                                                                                                                                                                                                                                                                                                                                                                                                                                                                                                                                                                                                                                                                                                                                                                                                                                                                                                                                                                                                                                                                                                                                                                                                                                    |
| Manuscript ID                 | bmjopen-2023-075158                                                                                                                                                                                                                                                                                                                                                                                                                                                                                                                                                                                                                                                                                                                                                                                                                                                                                                                                                                                                                                                                                                                                                                                                                                                                                                                                                                |
| Article Type:                 | Protocol                                                                                                                                                                                                                                                                                                                                                                                                                                                                                                                                                                                                                                                                                                                                                                                                                                                                                                                                                                                                                                                                                                                                                                                                                                                                                                                                                                           |
| Date Submitted by the Author: | 27-Apr-2023                                                                                                                                                                                                                                                                                                                                                                                                                                                                                                                                                                                                                                                                                                                                                                                                                                                                                                                                                                                                                                                                                                                                                                                                                                                                                                                                                                        |
| Complete List of Authors:     | <p>Thomas-Ruddel, Daniel; Jena University Hospital, Anesthesiology and Intensive Care<br/>         Bauer, Michael; Universitätsklinikum Jena, Klinik für Anästhesiologie und Intensivtherapie<br/>         Moita, Luís Ferreira; Instituto Gulbenkian de Ciência<br/>         Helbig, Christiane; Friedrich-Schiller-University<br/>         Schlattmann, Peter; Friedrich-Schiller-Universität Jena<br/>         Rahmel, Tim; Ruhr University Bochum, Department of Anesthesiology, Intensive Care Medicine and Pain Therapy, University Hospital Knappschaftskrankenhaus<br/>         Meybohm, Patrick; University Hospital Würzburg, , Department of Anaesthesiology, Intensive Care, Emergency and Pain Medicine<br/>         Gründling, Matthias; Universitätsmedizin Greifswald<br/>         Köcher, Thomas; Vienna BioCenter Core Facilities GmbH<br/>         Brunkhorst, Frank; Center for Clinical Studies, Department of Anesthesiology and Intensive Care Medicine; Paul-Martini Research Group, Department of Anesthesiology and Intensive Care Medicine<br/>         Gräler, Markus; Friedrich-Schiller-University, Department of Anesthesiology and Intensive Care Medicine<br/>         Heger, Ann-Julika; Friedrich-Schiller-University<br/>         Weis, Sebastian; Friedrich-Schiller-University, Department of Anesthesiology and Intensive Care Medicine</p> |
| Keywords:                     | INTENSIVE & CRITICAL CARE, CHEMOTHERAPY, INFECTIOUS DISEASES                                                                                                                                                                                                                                                                                                                                                                                                                                                                                                                                                                                                                                                                                                                                                                                                                                                                                                                                                                                                                                                                                                                                                                                                                                                                                                                       |
|                               |                                                                                                                                                                                                                                                                                                                                                                                                                                                                                                                                                                                                                                                                                                                                                                                                                                                                                                                                                                                                                                                                                                                                                                                                                                                                                                                                                                                    |

SCHOLARONE™  
Manuscripts

1  
2  
3  
4  
5  
6  
7  
8  
9

# Epirubicin for the Treatment of Sepsis & Septic Shock (EPOS-1): study protocol for a randomized, placebo-controlled Phase IIa dose escalation trial -BMJ OPEN-

10 Daniel Thomas-Rüddel <sup>1</sup>, Michael Bauer <sup>1</sup>, Luís Ferreira Moita <sup>2</sup>, Christiane Helbig <sup>3</sup>, Peter  
11 Schlattmann <sup>4</sup>, Tim Rahmel <sup>5</sup>, Patrick Meybohm <sup>6</sup>, Mathias Gründling <sup>7</sup>, Thomas Köcher <sup>8</sup>,  
12 Frank Brunkhorst <sup>1</sup>, Markus Gräler <sup>1</sup>, Ann-Julika Heger <sup>3</sup>, and Sebastian Weis <sup>1,9,10\*</sup> and the  
13 EPOS-1 study group  
14

15  
16 <sup>1</sup> Department of Anesthesiology and Intensive Care Medicine, Jena University Hospital,  
17 Friedrich-Schiller-University, Jena, Germany  
18

19 <sup>2</sup> Innate Immunity and Inflammation Laboratory, Instituto Gulbenkian de Ciência, 2780-156  
20 Oeiras, Portugal  
21

22 <sup>3</sup> Center for Clinical Studies, Jena University Hospital, Friedrich-Schiller-University, 07747  
23 Jena, Germany  
24

25 <sup>4</sup> Institute of Medical Statistics, Computer Sciences, and Data Science, Jena University  
26 Hospital, Friedrich-Schiller-University, 07747 Jena, Germany  
27

28 <sup>5</sup> Clinic for Anesthesiology, Intensive Care and Pain Therapy, University Medical Center  
29 Knappschafts Krankenhaus Bochum, 44892 Bochum, Germany  
30

31 <sup>6</sup> University Hospital Würzburg, Department of Anaesthesiology, Intensive Care, Emergency  
32 and Pain Medicine, 97080 Würzburg, Germany  
33

34 <sup>8</sup> Metabolomics Facility, Vienna BioCenter Core Facilities GmbH; Dr. Bohr-Gasse 3; 1030  
35 Wien, Österreich  
36

37  
38 <sup>9</sup> Institute for Infectious Disease and Infection Control, Jena University Hospital, Jena,  
39 Germany  
40

41 <sup>10</sup> Leibniz Institute for Infection Biology and Natural Products Research, Hans-Knöll Institute-  
42 HKI, Jena, Germany  
43

## Running Head

44  
45 EPOS-1  
46

## Keywords

47  
48 Sepsis, disease tolerance, epirubicin  
49

## Word Count

50  
51 3709/4000  
52

## Corresponding Author

53  
54  
55 Dr. Sebastian Weis, MD  
56 Institute for Infectious Disease and Infection Control  
57 Department of Anesthesiology and Intensive Care Medicine  
58 Jena University Hospital, Friedrich-Schiller University  
59 Am Klinikum 1  
60

Jena 07749, Germany

Leibniz Institute for Natural Product Research and Infection Biology, Hans Knöll Institute (HKI)

Phone: +49.3641.923-100

Email: [Sebastian.weis@med.uni-jena.de](mailto:Sebastian.weis@med.uni-jena.de)

Epos-1 study group collaborators:

Würzburg: Tobias Haas, Philipp Helmer, Sebastian Hottenrott, Eva Kranke, Peter Kranke, Marianne Neuf, Anke Reppchen, Daniel Röder,

Bochum: Andre Hagedorn, Matthias Unterberg, Andrea Wittkowski,

Jena: Frank Bloos, Karen Dlubatz, Stefan Hagel, Jakob Hammersen, Franziska Röstel, Johannes Roth, Wolfgang Vivas-Varela

Greifswald: Christian Fuchs, Andreas Greinacher, Sven-Olaf Kuhn

## ABSTRACT

**Introduction:** Sepsis remains the major cause of death among hospitalized patients in intensive care. While targeting sepsis-causing pathogens with source control or antimicrobials had a dramatic impact on morbidity and mortality of sepsis patients, it remains insufficient for about one-third of the affected individuals that still succumb. Pharmacological targeting of mechanisms that reduce sepsis-defining organ dysfunction should be beneficial. When given in low doses, the anthracycline epirubicin promoted tissue damage control and lessen severity of sepsis acting independently of the host pathogen load, conferring disease tolerance to infection. Since epirubicin at higher doses can be myelotoxic, a first-dose response trial is necessary to assess potential harm by this drug in this indication.

**Methods and analysis:** EPOS-1 is a randomized, double-blind, placebo-controlled phase 2 dose-escalation phase IIa clinical trial to assess the safety of a single low dose of epirubicin as an adjunctive in patients with sepsis. The primary endpoint is the 14-day myelotoxicity. Secondary and explorative outcomes include 30- and 90-day mortality, organ dysfunction, PK/PD, cytokine release. Patients will be randomized in three consecutive phases. For each study phase patients are randomized to one of the two study arms (epirubicin or placebo) in a 4:1 ratio. Patients in the epirubicin group will receive a single dose of epirubicin (3.75 mg/m<sup>2</sup>, 7.5 mg/m<sup>2</sup> or 15 mg/m<sup>2</sup> depending on study phase. After each study phase, a DSMB will recommend continuation or premature stopping of the trial. The primary analyses for each dose level will report the proportion of myelotoxicity together with a 95% confidence interval. A potential dose-toxicity association will be analyzed using a logistic regression model with dose as covariate. All further analyses for this study will be descriptive.

**Ethics and dissemination:** The protocol is approved by the German Federal Institute for Drugs and Medical Devices. The results will be submitted for publication in peer-reviewed journals.

**Trial registration:** Clinicaltrials.gov NCT05033808

## STRENGTHS AND LIMITATIONS OF THIS STUDY

- EPOS-1 is a randomized, placebo-controlled, double-blind, single dose escalation phase IIa trial.
- This is the first clinical trial that pharmacologically targets a disease tolerance mechanism.
- Epirubicin will be repurposed with another concentration in a new indication.
- This trial is not powered to assess an effect on mortality.

## INTRODUCTION

Sepsis is defined as life-threatening organ dysfunction caused by a dysregulated host response to infection [1] and despite improvement in outcomes mortality still ranges from 15-25% and can be as high as 50% in case of septic shock<sup>1</sup> [2]. Treatment relies on infection control by antibiotics and source control and supportive therapy, e.g. by fluid resuscitation, vasopressors, respiratory support, or dialysis. Sepsis mortality rates have not decreased substantially over the last years and new treatment strategies are scarce. Targeting the immune system has mainly failed [3], potentially due to the syndromic nature of sepsis and the wide variety of clinical presentations. Immunophenotyping [4] and subsequent personalized immunotherapy are currently deployed in clinical trials that include patients presenting only with extreme phenotypes such as immunosuppression or hyperinflammation [5]. Yet, for the common sepsis denominator, *i.e.* organ dysfunction [6], no effective sepsis-specific treatments are established in clinical practice [2, 7]. Noteworthy, the strategies that have been deployed to decrease specifically infectious disease mortality all share the same mode of action, *i.e.* the reduction of pathogen burden. This strategy is essentially also used by the immune system and in this context referred to as “resistance to infection” [8-10]. Another defense strategy termed “disease tolerance to infection” has not been explored pharmacologically in medicine. In experimental models, this defense strategy has been shown to decrease disease severity by supporting host homeostasis via limiting the extent of tissue damage associated with infection and promoting its repair [8, 9, 11]. It is achieved using genetically encoded and evolutionarily conserved stress and damage response mechanisms [11]. Anthracyclines, a class of drugs used in chemotherapy for over 30 years, have been shown to enhance disease tolerance when given in low doses.

Notably, epirubicin has been shown to increase survival in animal models of sepsis. This effect was not associated with a decrease in pathogen loads of the infected organism [12]. This indicates that application of epirubicin would act in a way to enforce disease tolerance mechanisms. Further data shows that epirubicin activated the DNA damage response pathways in cells, rendering them less susceptible to infection-associated stress [12]. Survival benefits prevailed when epirubicin was administered 24 hours after sepsis induction [12]. This makes epirubicin a potential candidate for a new therapeutic option in sepsis. We are not aware of any studies or case reports that applied anthracyclines for this indication. Epirubicin has been used at doses up to 30 mg/m<sup>2</sup> without toxicity in earlier studies with cancer patients. This is a higher dosage than what is intended in the EPOS-1 trial. Based on the existing preclinical evidence, we designed the EPOS-1 trial to test the hypothesis that low-dose epirubicin is safe in patients with sepsis.

## METHODS AND ANALYSIS

EPOS-1 is a randomized, placebo-controlled dose escalation phase IIa trial to assess the safety of a single low dose of epirubicin as an adjunctive therapy for patients with sepsis. The primary endpoint of the study is myelotoxicity at day 14 after application of epirubicin. Secondary and exploratory endpoints are the rate and level of organ dysfunction, the pharmacokinetic/pharmacodynamic of epirubicin, concentration of cytokines in plasma and the DNA damage in leukocytes and mortality.

### Study design and setting

The trial will recruit sepsis patients admitted to intensive care (ICU) and intermediate care units (IMC) in German university hospitals. Patients will be randomized subsequently to three study phases with increasing doses of epirubicin or placebo in a 4:1 ratio. After each study phase a safety analysis will take place before the trial with new patients proceeds to the next higher dose.

### Study population

The study population consists of adult patients ≥18 years of age admitted to the intensive care units (ICU) or intermediate care units (IMC) with sepsis or septic shock in one of the five

1  
2  
3 participating centers. There are no gender restrictions or preferences. Screening will be  
4 performed daily at the respective trial centers to assess whether eligible subjects are present  
5 in the ICUs or IMC. Pregnant or breastfeeding women are not eligible for participation in this  
6 clinical trial. All inclusion and exclusion criteria are listed in [Box 1](#).  
7

### 8 **Trial management**

9 The trial is led by the sponsor representative and coordinating investigator (SW) and his deputy  
10 (DTR). They are supported by the Center for Clinical Studies of Jena University Hospital (ZKS)  
11 (project manager CH), which is responsible for trial management and monitoring the source  
12 data. Biosamples are analyzed at the laboratory of the coordinating investigator and in the  
13 laboratories of cooperating partners.  
14

15 The data and safety monitoring board (DSMB) is composed of three external experts (an  
16 intensive care physician, an oncologist, and a statistician). The DSMB is regulated by a  
17 standardized operating procedure. The main function of the DSMB is to monitor the safety of  
18 the study. All Suspected Unexpected Serious Adverse Reaction (SUSARs) and all cases  
19 fulfilling the primary endpoint definition of myelotoxicity will be reported to the data safety  
20 monitoring board (DSMB). Data for interim analysis will be cleaned and prepared for  
21 presentation and reported to the DSMB if at least two patients in the placebo group and at  
22 least eight patients in the respective epirubicin group have completed the 14-day follow-up.  
23 The DSMB will convene meetings in context of interim analysis and additional ad hoc meetings  
24 if necessary. Following each meeting, the DSMB will recommend continuation, modification,  
25 or discontinuation of the study based on observed toxicities.  
26

### 27 **Randomization and study procedures**

28 The local pharmacies at each trial site have access to a web-based central randomization  
29 service, which is available 24 hours / 7 days. The randomization list is prepared by an  
30 independent statistician via a computer-based algorithm and is stratified by study center. For  
31 each study phase patients are randomized to one of the two study arms (epirubicin or placebo)  
32 in a 4:1 ratio. A unique patient ID is generated for data collection throughout the trial ([Figure](#)  
33 [1](#)). Patients in the epirubicin group will receive a single dose of epirubicin. The amount of  
34 epirubicin is determined by the study phase and increased from 3.75 mg/m<sup>2</sup> in phase 1 to 7.5  
35 mg/m<sup>2</sup> in phase 2 to 15 mg/m<sup>2</sup> in phase 3. This corresponds to approximately 4%-16% of the  
36 epirubicin dosage applied in a single course of chemotherapy. The highest dose corresponds  
37 to the amount that had beneficial effects in mice [12].  
38

39 The study medication is prepared in the hospital pharmacies of the trial sites by unblinded  
40 personal and then delivered to the ICU/IMC. Since epirubicin has a typical red color the study  
41 medication is delivered blinded in colored bags already connected to colored infusion systems.  
42 In addition, the bags will be covered by an opaque light protection pouch. At the trial site the  
43 infusion system is prefilled with NaCl solution via a side port before connection to the patient's  
44 central line. The transparent parts of the central line are then covered by an opaque towel  
45 before the application of the IMP is started. After administration of the IMP the infusion system  
46 is flushed by normal saline to remove all residues of the IMP before the towel is removed and  
47 the infusion system is disconnected from the patient's infusion line.  
48

49 An overview of the study procedures and assessments is provided in [Table 2](#). Acute physiology  
50 data will be documented directly before and at seven visits up to 24 hours after the  
51 Interventional Medical Product (IMP) administration. Plasma will be centrifugated and stored  
52 at -80°C for further analysis. Peripheral Blood Monocytic cells (PBMCs) will be isolated at the  
53 trial sited using a commercially available kit (MACSprep™ PBMC Isolation Kit, Miltenyi Biotec)  
54

### 55 **Primary endpoint**

56 Safety as assessed by myelotoxicity until day 14 after epirubicin application is the primary  
57 endpoint. Myelotoxicity is the most relevant side effect of anthracycline treatment in cancer  
58 patients and can result in neutropenia. This would put patients at risk of developing severe  
59 infections. In cancer studies, myelotoxicity is a commonly used outcome parameter [13-15].  
60 The primary endpoint myelotoxicity will be determined by automated or manual differential

1  
2  
3 blood count in the respective Departments of Clinical Chemistry. A blood count will be  
4 measured 24 hours, 2, 3, 5, 7, 10, 12 and 14 days, days after administration of verum/placebo.  
5 Assessing myelotoxicity in sepsis patients can be complicated since leukopenia, neutropenia  
6 and thrombocytopenia [16-19] are all being observed in a relevant proportion of sepsis  
7 patients. In rare cases this might be a sign of sepsis-induced myelosuppression, but in most  
8 cases, this is caused by increased consumption or sequestration. Immature platelet fraction  
9 (IPF) is a parameter reflecting megakaryocyte activity and is therefore reflecting platelet  
10 production [20]. Thrombocytopenia with a normal or elevated IPF is indicative of increased  
11 consumption and turnover with a normal bone marrow function and is a common finding in  
12 sepsis [20, 21]. In contrast, thrombocytopenia with a decreased IPF is indicative of a bone  
13 marrow depression. Leukopenia and neutropenia in sepsis are typically present early in the  
14 disease and are followed by normal or elevated leucocyte counts, while neutropenia due to  
15 myelotoxicity is prolonged. Neutropenia and thrombocytopenia in sepsis are not closely  
16 correlated with each other, as the pathophysiological processes are different, while  
17 myelosuppression normally affects all cell types.

18  
19 To differentiate the best possible way between sepsis-associated alterations and “real”  
20 Epirubicin-induced myelotoxicity the primary safety endpoint of myelotoxicity is defined as  
21 follows:

22 Neutropenia of grade 3 or 4 ([Error! Reference source not found.](#)) at two consecutive study  
23 visits up to day 14 or thrombocytopenia of grade 3 or 4 ([Error! Reference source not found.](#))  
24 at two consecutive study visits up to day 14 accompanied by neutropenia or thrombocytopenia  
25 of grade 2, 3 or 4 at both study visits and accompanied by an IPF below 2.5% at one or two of  
26 the consecutive study visits ([Figure 2](#)).

### 27 28 **Secondary endpoint**

29 Secondary endpoints for safety are cardiotoxicity, assessed by transthoracic  
30 echocardiography 7 days after epirubicin application, the frequency of other typical side effects  
31 (diarrhea, mucositis, alopecia, nausea and vomiting) and the overall rate of adverse and severe  
32 adverse events. In addition, we will assess the inflammatory response measuring serum  
33 cytokines, PCT and CRP. A “success” rate defined as a decrease of procalcitonin (PCT) serum  
34 concentration by 80% or more of its intra-individual peak value or to 0.5 µg/L or lower within  
35 72 hours after randomization (following the “Stop Antibiotics on Procalcitonin guidance Study”  
36 (SAPS) by de Jong *et al.* [22] will be assessed. For organ function, SOFA on days of  
37 assessment, mean total SOFA and SOFA changes over time in the participants will be  
38 assessed. We will further assess fluid balance, urine output, need for renal replacement  
39 therapy,  $\text{paO}_2/\text{FiO}_2$  ratio, need for respiratory support and catecholamines and inotropes.  
40 Mortality will be assessed at day 14, 28 and 90 after randomization, quality of life will be  
41 assessed at day 90 in survivors by *Short Form 36 Health Questionnaire* (SF-36). Explorative  
42 objectives include pharmacokinetics and pharmacodynamics of epirubicin, by measuring DNA  
43 damage. Effects on inflammatory response will be further assessed by measuring additional  
44 cytokines and additional molecular markers for organ damage will be analyzed. For better  
45 characterization of immune cell composition, thrombocyte numbers and bone marrow function  
46 FACS of PBMCs, Anti-PF4 antibodies and reticulocytes will be assessed.

### 47 48 49 **Sample size and Power Considerations**

50 This is an exploratory trial to show safety of low-dose epirubicin in sepsis. It will serve as a pilot  
51 study for a subsequent a larger subsequent phase II/III trial, in case that epirubicin is safe in  
52 this indication. In each cohort, we will assign eight patients to epirubicin and two to placebo.  
53 Based on the assumption that the probability of a myelotoxicity is 18% the probability of  
54 observing at least one myelotoxicity out of eight verum-treated patients equals 79.6% based  
55 on a binomial distribution. Thus, a total of 30 (8 x verum vs. 2 x placebo from each phase)  
56 patients that reach the 14-day safety endpoint is required. Assuming a mortality of sepsis  
57 patients of 30%, it is anticipated, that approximately 12 patients in the epirubicin group and 3  
58 patients in the placebo group per phase will need to be included in the study. Dropouts until  
59 day 14 will be replaced until necessary numbers are reached (see [Figure 1](#)).

### Data collection/data management

Data will be collected on an electronic case report form (CRF) using OpenClinica® (OpenClinica, LLC, Waltham, MA, USA) by a trained investigator or study assistant at each the respective trial center. Monitoring will be performed by the ZKS Jena to its local standard operating procedures (SOPs). Monitoring in general will be performed on-site. All serious adverse events (SAEs), whether related or not related to study medication, must be reported until 90 days after administration of IMP/control. Patients or relatives are contacted on day 28 and day 90 after randomization to obtain survival status of the participants.

The recommendation will be brought to the attention of the competent higher federal authority and the leading ethics committee as part of the annual safety report or as an urgent safety measure, if necessary.

### Statistical analysis

The primary analyses for each dose level will report the proportion of myelotoxicity together with a 95% confidence interval. A potential dose-toxicity association will be analyzed using a logistic regression model with dose as covariate. All further analyses for this study will be descriptive. Data analyses will be provided by treatment and overall if applicable. After first and second phase, the data safety monitoring board will meet and recommend whether the study will be stopped, or the next higher dose phase can be initiated. The DSMB will be provided with the necessary pre-analyzed and raw data. The major stopping rule of the trial will consist of increased toxicity in epirubicin groups as assessed by myelotoxicity.

### Ethics and dissemination

Sponsor of the trial is the Friedrich Schiller University. The trial was approved by the ethics committee of the Jena University Hospital on 20 December 2021 (2021-2440-AMG-ff) and the German Health Authorities (BfArM) on 08 November 2021. In addition, the local ethics committees at each site approved the study protocol and the study competence of each site. Written informed consent is obtained from all patients or their legal representatives. If this is not possible before enrolment in due time, the ethics committees have approved a deferred consent process where the inability to provide consent is confirmed by an independent physician, and the patient is enrolled without informed consent. As soon as the legal representative of the patient is available, written informed consent is immediately obtained; otherwise, the patient is withdrawn from the study and all study procedures are ended.

The trial is governed by the international standards for Good Clinical Practice (GCP) developed by the International Council for Harmonization of Technical Requirements for Pharmaceuticals for Human Use (ICH), the Directive 2001/20/EC for clinical trials and General Data Protection Regulation (GDPR) 679/2016 (EC). Results of the trial will be published in a peer reviewed journal and reported on clinicaltrials.org. All publication will be available in open access.

### Patient and public involvement

Patients or the public were not involved in the design of the EPOS-1 trial. The trial design was endorsed by the Deutsche Sepsis Gesellschaft.

## DISCUSSION

Despite tremendous research efforts during the last decades, no specific therapy for sepsis exists that targets sepsis-associated organ dysfunction [2]. Instead, treatment relies on the timely administration of broad-spectrum antibiotics, mechanical organ support, along with focus sanitation and if necessary organ replacement therapy. Increasing rates of antimicrobial resistance and lack of innovation of new antimicrobials further add to the problem [2, 7]. Therefore, new therapeutic approaches are urgently needed. In this study for the first time, we will pharmacologically intent to manipulate disease tolerance to infection, a molecular mechanism that lessens disease severity by enforcing tissue damage control [23-25]. Presumably, manipulation of tissue damage control mechanisms will not impose selection pressure on the pathogens and therefore should not cause anti-microbial resistance to the applied drugs [11, 26]. The primary aim of this study is to demonstrate safety and tolerability



of a low dose of epirubicin in sepsis patients. This drug has recently been shown to induce disease tolerance and tissue damage control in animal models of sepsis [12, 27].

With this randomized-controlled, multicenter trial, we aim to investigate whether the administration of low-dose epirubicin is safe in patients with sepsis and septic shock. If this approach proves to be successful, we would be able to provide a sepsis-specific therapy for the 1<sup>st</sup> time; *i.e.* targeting the deleterious organ failure. This might ultimately also decrease the rate of antibiotic consumption in the critically ill and improve the anti-microbial resistance rates. In addition, if epirubicin proves to be safe and beneficial for patients with sepsis, it might also extend treatment options for patients living in areas with limited resources and high antimicrobial resistance rates such as in African countries or the Indian subcontinent, amongst others in which assessment of causing pathogens, determination of antimicrobial resistance patterns is not available for the majority of patients and in which expensive antibiotics cannot be applied.

The overall treatment algorithm of patients participating in the clinical trial follows the standard practice for this condition and is in accordance with current guidelines for the treatment of such patients

A drug licensed for chemotherapy will be applied to a highly vulnerable group, *i.e.* sepsis patient. Intuitively, this seems to be contraindicated. However, our approach is not intended to use its chemotherapeutic potency. Instead, its potential to induce damage response mechanisms will be applied [12]. Drug dosages are significantly lower than applied in a single chemotherapeutic cycle. Therefore, relevant toxicity is not expected. Close safety monitoring will be performed and the major stopping rule of the trial will consist of increased toxicity in the groups that receive epirubicin. As such, in our opinion, the benefits substantially outweigh the potential risks in this trial.

## REFERENCES

1. Singer, M., et al., *The Third International Consensus Definitions for Sepsis and Septic Shock (Sepsis-3)*. JAMA, 2016. **315**(8): p. 801-10.
2. Cohen, J., et al., *Sepsis: a roadmap for future research*. Lancet Infect Dis, 2015. **15**(5): p. 581-614.
3. Marshall, J.C., *Why have clinical trials in sepsis failed?* Trends Mol Med, 2014. **20**(4): p. 195-203.
4. Scicluna, B.P., et al., *A molecular biomarker to diagnose community-acquired pneumonia on intensive care unit admission*. Am J Respir Crit Care Med, 2015. **192**(7): p. 826-35.
5. Kotsaki, A., et al., *ImmunoSep (Personalised Immunotherapy in Sepsis) international double-blind, double-dummy, placebo-controlled randomised clinical trial: study protocol*. BMJ Open, 2022. **12**(12): p. e067251.
6. Bauer, M., et al., *Deterioration of Organ Function As a Hallmark in Sepsis: The Cellular Perspective*. Front Immunol, 2018. **9**: p. 1460.
7. Angus, D.C. and T. van der Poll, *Severe sepsis and septic shock*. N Engl J Med, 2013. **369**(9): p. 840-51.
8. Medzhitov, R., D.S. Schneider, and M.P. Soares, *Disease Tolerance as a Defense Strategy*. Science, 2012. **335**: p. 936-41.
9. Soares, M.P., L. Teixeira, and L.F. Moita, *Disease tolerance and immunity in host protection against infection*. Nat Rev Immunol, 2017.
10. Bauer, M., et al., *Towards an ecological definition of sepsis: a viewpoint*. Intensive Care Med Exp, 2021. **9**(1): p. 63.
11. Soares, M.P., R. Gozzelino, and S. Weis, *Tissue damage control in disease tolerance*. Trends Immunol, 2014. **35**(10): p. 483-94.
12. Figueiredo, N., et al., *Anthracyclines induce DNA damage response-mediated protection against severe sepsis*. Immunity, 2013. **39**(5): p. 874-84.

13. Mross, K., et al., *Randomized phase II study of single-agent epirubicin +/- verapamil in patients with advanced metastatic breast cancer. An AIO clinical trial. Arbeitsgemeinschaft Internistische Onkologie of the German Cancer Society.* Ann Oncol, 1993. **4**(1): p. 45-50.
14. Calero, F., et al., *Single agent epirubicin in squamous cell cervical cancer. A phase II trial.* Acta Oncol, 1991. **30**(3): p. 325-7.
15. Jakobsen, P., et al., *A randomized study of epirubicin at four different dose levels in advanced breast cancer. Feasibility of myelotoxicity prediction through single blood-sample measurement.* Cancer Chemother Pharmacol, 1991. **28**(6): p. 465-9.
16. Venkata, C., et al., *Thrombocytopenia in adult patients with sepsis: incidence, risk factors, and its association with clinical outcome.* J Intensive Care, 2013. **1**(1): p. 9.
17. Vandijck, D.M., et al., *Thrombocytopenia and outcome in critically ill patients with bloodstream infection.* Heart Lung, 2010. **39**(1): p. 21-6.
18. Tsigotis, P., et al., *Thrombocytopenia in critically ill patients with severe sepsis/septic shock: Prognostic value and association with a distinct serum cytokine profile.* J Crit Care, 2016. **32**: p. 9-15.
19. Sharma, B., et al., *Thrombocytopenia in septic shock patients--a prospective observational study of incidence, risk factors and correlation with clinical outcome.* Anaesth Intensive Care, 2007. **35**(6): p. 874-80.
20. Jeon, K., et al., *Immature platelet fraction: A useful marker for identifying the cause of thrombocytopenia and predicting platelet recovery.* Medicine (Baltimore), 2020. **99**(7): p. e19096.
21. Park, S.H., et al., *Immature platelet fraction in septic patients: clinical relevance of immature platelet fraction is limited to the sensitive and accurate discrimination of septic patients from non-septic patients, not to the discrimination of sepsis severity.* Ann Lab Med, 2016. **36**(1): p. 1-8.
22. de Jong, E., et al., *Efficacy and safety of procalcitonin guidance in reducing the duration of antibiotic treatment in critically ill patients: a randomised, controlled, open-label trial.* Lancet Infect Dis, 2016. **16**(7): p. 819-27.
23. Jamieson, A.M., et al., *Role of tissue protection in lethal respiratory viral-bacterial coinfection.* Science, 2013. **340**(6137): p. 1230-4.
24. Larsen, R., et al., *A central role for free heme in the pathogenesis of severe sepsis.* Sci Transl Med, 2010. **2**(51): p. 51ra71.
25. Weis, S., et al., *Metabolic Adaptation established Disease Tolerance to Sepsis.* CELL, 2017. **169**: p. 1-13.
26. Read, A.F., A.L. Graham, and L. Raberg, *Animal defenses against infectious agents: is damage control more important than pathogen control.* PLoS Biol, 2008. **6**(12): p. e4.
27. Rialdi, A., et al., *Topoisomerase 1 inhibition suppresses inflammatory genes and protects from death by inflammation.* Science, 2016.
28. Kurtin, S., *Myeloid toxicity of cancer treatment.* J Adv Pract Oncol, 2012. **3**(4): p. 209-24.

## FIGURES AND TABLES

**Box 1:** Inclusion and exclusion criteria of the EPOS-1 trial.

| Inclusion Criteria                                                                                                                                                                                                 |
|--------------------------------------------------------------------------------------------------------------------------------------------------------------------------------------------------------------------|
| Patients $\geq 18$ years admitted to the ICU/IMC with sepsis or septic shock                                                                                                                                       |
| Sepsis diagnosis within 24 hours prior to screening regardless of site of infection                                                                                                                                |
| Informed consent of patient or their legal representative or if not possible a statement by an independent physician                                                                                               |
| Exclusion criteria                                                                                                                                                                                                 |
| Leukopenia/Neutropenia/Thrombocytopenia-prior or upon inclusion (Leukocyte Count $< 4,000/\mu\text{L}$ ; Neutrophil/Thrombocyte Count below Lower Limit of Normal)                                                 |
| Weight $> 135$ kg/BMI $> 45$ .                                                                                                                                                                                     |
| Active neoplasia.                                                                                                                                                                                                  |
| History of chemotherapy.                                                                                                                                                                                           |
| Hypersensitivity to epirubicin.                                                                                                                                                                                    |
| History of bone marrow or solid organ transplantation.                                                                                                                                                             |
| Immunosuppressive therapy.                                                                                                                                                                                         |
| Acute severe infection within 4 weeks prior to admission (Hospitalization for an infection or in case of hospital acquired infection transfer to a higher level of care due to the infection)                      |
| Chronic infection.                                                                                                                                                                                                 |
| Cardiomyopathy with a documented ejection fraction $< 30\%$ or ICD implantation.                                                                                                                                   |
| Acute liver failure following the European Association for the Study of the Liver definition as International Normalized Ratio (INR) $> 1.5$ and elevation of transaminases $> 3$ times of the upper normal limit. |
| Pregnancy during all trimester/breast-feeding.                                                                                                                                                                     |
| Chronic mechanical ventilation dependency.                                                                                                                                                                         |
| Cystic fibrosis.                                                                                                                                                                                                   |
| Concomitant medication with Verapamil or Cimetidine.                                                                                                                                                               |
| Prior enrollment in this study.                                                                                                                                                                                    |
| Participation in another clinical intervention trial.                                                                                                                                                              |

**Figure 1:** Study design of the EPOS-1 trial. Black bordered circles indicate minimal participants for the safety analysis. Red bordered circles indicate patients that were randomized and received the study drug or placebo are expected not to reach the 14-day safety endpoint considering sepsis-related mortality of up to 30%. Assessment indicates a safety assessment of the DSMB and a study continuation or stop following their recommendation.

Abbreviation: Epi.. epirubicin, hrs.. hours.

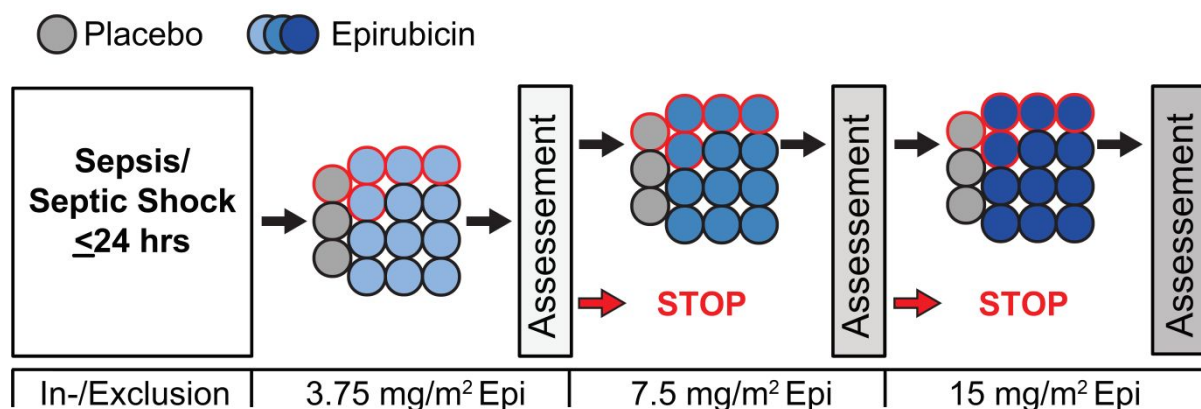

**Figure 2:** Flow chart that is used to determine the primary endpoint, *i.e.* myelotoxicity in the EPOS-1 trial. \* for visit Day 2 the previous visit to be considered is Day 0-24 hrs.

Abbreviation: hrs.. hours

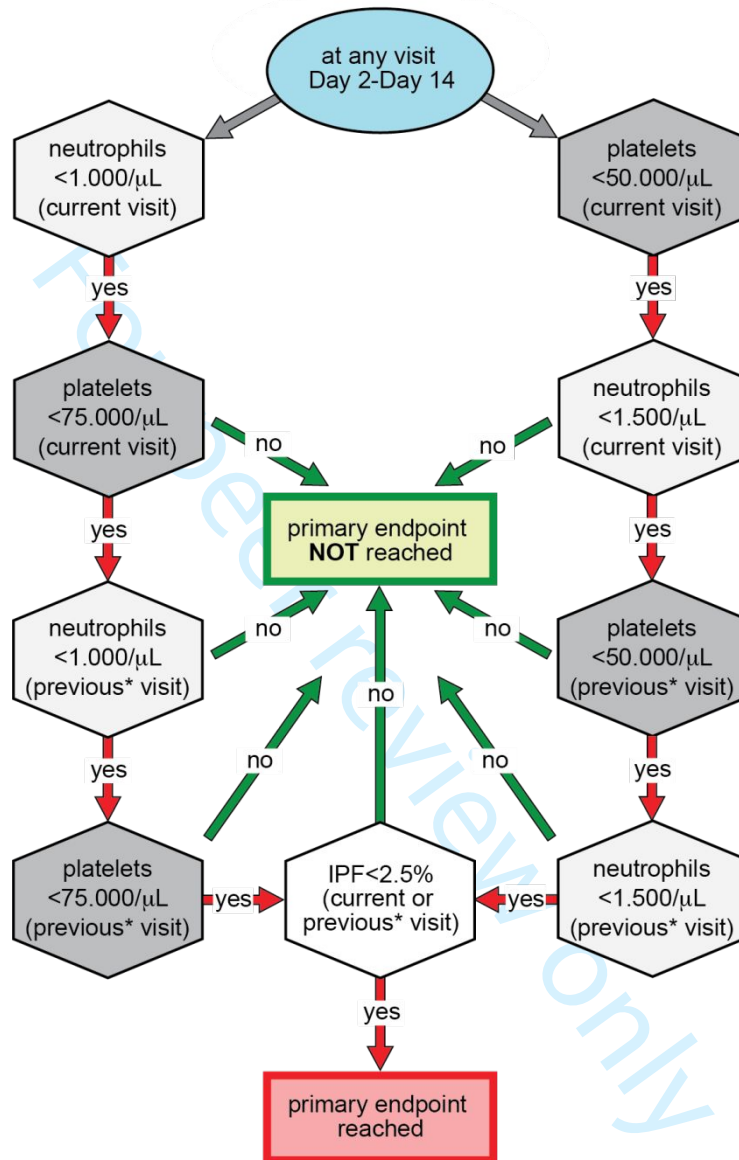

**Table 1:** Study procedures and visits.

| Time (Days)                              | Pre | D0<br>First 24 hours |    |      |        |       |     |      |      | D1   | D2 | D3 | D5 | D7  | D10  | D12 | D14 | D28±2 | D90±4 |  |
|------------------------------------------|-----|----------------------|----|------|--------|-------|-----|------|------|------|----|----|----|-----|------|-----|-----|-------|-------|--|
| Time (Min)                               |     | 0                    | 15 | 60±5 | 120±10 |       |     |      |      |      |    |    |    |     |      |     |     |       |       |  |
| Time (hours)                             |     |                      |    | 1    | 2      | 3±0,5 | 6±1 | 12±2 | 24±4 |      |    |    |    |     |      |     |     |       |       |  |
| Visit                                    | B   | 0                    | I  | II   | III    | IV    | V   | VI   | VII  | VIII | IX | X  | XI | XII | XIII | XIV | XV  | XVI   | XVII  |  |
| Inclusion/Exclusion Criteria             | X   |                      |    |      |        |       |     |      |      |      |    |    |    |     |      |     |     |       |       |  |
| Written Informed Consent                 | X   |                      |    |      |        |       |     |      |      |      |    |    |    |     |      |     |     |       |       |  |
| Pregnancy Test <sup>1</sup>              | X   |                      |    |      |        |       |     |      |      |      |    |    |    |     |      |     |     |       |       |  |
| Randomization                            | X   |                      |    |      |        |       |     |      |      |      |    |    |    |     |      |     |     |       |       |  |
| Baseline Assessment                      | X   |                      |    |      |        |       |     |      |      |      |    |    |    |     |      |     |     |       |       |  |
| SOFA                                     | X   |                      |    |      |        |       |     |      |      | X    | X  | X  | X  | X   | X    | X   | X   |       |       |  |
| SAPS II / qSOFA                          | X   |                      |    |      |        |       |     |      |      |      |    |    |    |     |      |     |     |       |       |  |
| Clinical parameters                      | X   |                      |    |      |        |       |     |      |      | X    | X  | X  | X  | X   | X    | X   | X   |       |       |  |
| Routine laboratory                       | X   |                      |    |      |        |       |     |      |      | X    | X  | X  | X  | X   | X    | X   | X   |       |       |  |
| Treatment parameters on the ICU/IMC      | X   |                      |    |      |        |       |     |      |      | X    | X  | X  | X  | X   | X    | X   | X   |       |       |  |
| Application of study drug                |     | X                    |    |      |        |       |     |      |      |      |    |    |    |     |      |     |     |       |       |  |
| Acute physiology                         |     | X                    | X  | X    | X      | X     | X   | X    | X    |      |    |    |    |     |      |     |     |       |       |  |
| Plasma sampling                          |     | X                    | X  | X    | X      | X     | X   | X    | X    |      | X  | X  | X  | X   |      |     |     | X     |       |  |
| PBMC sampling                            |     | X                    |    |      |        |       | X   |      | X    |      | X  |    | X  |     |      |     |     |       |       |  |
| Urine sampling                           |     | X                    |    |      |        |       |     |      | X    |      | X  |    |    |     |      |     |     |       |       |  |
| Differential Blood Count/Neutrophils/IPF |     | X                    |    |      |        |       |     |      | X    |      | X  | X  | X  | X   | X    | X   | X   |       |       |  |
| Anti-PF4                                 |     | X                    |    |      |        |       |     |      |      |      |    |    |    | X   |      |     |     | X     |       |  |
| AE / SAE                                 |     |                      | X  | X    | X      | X     | X   | X    | X    | X    | X  | X  | X  | X   | X    | X   | X   | X     | X     |  |
| Echocardiography                         |     |                      |    |      |        |       |     |      |      |      |    |    |    | X   |      |     |     |       |       |  |
| Survival                                 |     |                      |    |      |        |       |     |      |      |      |    |    |    |     |      |     | X   | X     | X     |  |
| SF-36                                    |     |                      |    |      |        |       |     |      |      |      |    |    |    |     |      |     |     |       | X     |  |

<sup>1</sup>blood or urine

**Table 2:** Grading of neutropenia and thrombocytopenia (following [28]).

|                | <b>Neutropenia</b> (acute neutrophil count) | <b>Thrombocytopenia</b> (platelets)    |
|----------------|---------------------------------------------|----------------------------------------|
| <b>Grade 1</b> | <Lower limit of normal- 1,500/ $\mu$ L      | <Lower limit of normal-75,000/ $\mu$ L |
| <b>Grade 2</b> | <1,500-1,000/ $\mu$ L                       | <75,000-50,000/ $\mu$ L                |
| <b>Grade 3</b> | <1,000-500/ $\mu$ L                         | <50,000-25,000/ $\mu$ L                |
| <b>Grade 4</b> | < 500/ $\mu$ L                              | < 25,000/ $\mu$ L                      |

# BMJ Open

## Epirubicin for the Treatment of Sepsis & Septic Shock (EPOS-1): study protocol for a randomized, placebo-controlled Phase IIa dose escalation trial

|                                 |                                                                                                                                                                                                                                                                                                                                                                                                                                                                                                                                                                                                                                                                                                                                                                                                                                                                                                                                                                                                                                                                                                                                                                                                                                                                                                                                                                                                                                                                                                                                                                                                                                                                                                            |
|---------------------------------|------------------------------------------------------------------------------------------------------------------------------------------------------------------------------------------------------------------------------------------------------------------------------------------------------------------------------------------------------------------------------------------------------------------------------------------------------------------------------------------------------------------------------------------------------------------------------------------------------------------------------------------------------------------------------------------------------------------------------------------------------------------------------------------------------------------------------------------------------------------------------------------------------------------------------------------------------------------------------------------------------------------------------------------------------------------------------------------------------------------------------------------------------------------------------------------------------------------------------------------------------------------------------------------------------------------------------------------------------------------------------------------------------------------------------------------------------------------------------------------------------------------------------------------------------------------------------------------------------------------------------------------------------------------------------------------------------------|
| Journal:                        | <i>BMJ Open</i>                                                                                                                                                                                                                                                                                                                                                                                                                                                                                                                                                                                                                                                                                                                                                                                                                                                                                                                                                                                                                                                                                                                                                                                                                                                                                                                                                                                                                                                                                                                                                                                                                                                                                            |
| Manuscript ID                   | bmjopen-2023-075158.R1                                                                                                                                                                                                                                                                                                                                                                                                                                                                                                                                                                                                                                                                                                                                                                                                                                                                                                                                                                                                                                                                                                                                                                                                                                                                                                                                                                                                                                                                                                                                                                                                                                                                                     |
| Article Type:                   | Protocol                                                                                                                                                                                                                                                                                                                                                                                                                                                                                                                                                                                                                                                                                                                                                                                                                                                                                                                                                                                                                                                                                                                                                                                                                                                                                                                                                                                                                                                                                                                                                                                                                                                                                                   |
| Date Submitted by the Author:   | 06-Mar-2024                                                                                                                                                                                                                                                                                                                                                                                                                                                                                                                                                                                                                                                                                                                                                                                                                                                                                                                                                                                                                                                                                                                                                                                                                                                                                                                                                                                                                                                                                                                                                                                                                                                                                                |
| Complete List of Authors:       | <p>Thomas-Ruddel, Daniel; Jena University Hospital, Anesthesiology and Intensive Care<br/>         Bauer, Michael; Universitätsklinikum Jena, Klinik für Anästhesiologie und Intensivtherapie<br/>         Helbig, Christiane; Friedrich-Schiller-University<br/>         Schlattmann, Peter; Friedrich-Schiller-Universität Jena<br/>         Moita, Luís Ferreira; Instituto Gulbenkian de Ciência<br/>         Ehler, Johannes; Jena University Hospital, Anesthesiology and Intensive Care<br/>         Rahmel, Tim; Ruhr University Bochum, Department of Anesthesiology, Intensive Care Medicine and Pain Therapy, University Hospital Knappschaftskrankenhaus<br/>         Meybohm, Patrick; University Hospital Würzburg, , Department of Anaesthesiology, Intensive Care, Emergency and Pain Medicine<br/>         Gründling, Matthias; Universitätsmedizin Greifswald<br/>         Schenk, Heiko; Hannover Medical School<br/>         Köcher, Thomas; Vienna BioCenter Core Facilities GmbH<br/>         Brunkhorst, Frank; Center for Clinical Studies, Department of Anesthesiology and Intensive Care Medicine; Paul-Martini Research Group, Department of Anesthesiology and Intensive Care Medicine<br/>         Heger, Ann-Julika; Friedrich-Schiller-University<br/>         Gräler, Markus; Friedrich-Schiller-University, Department of Anesthesiology and Intensive Care Medicine<br/>         Weis, Sebastian; Friedrich Schiller University Jena, Department of Anesthesiology and Intensive Care Medicine<br/>         study group, EPOS-1; Jena University Hospital<br/>         TrialsGroup, SepNetCriticalCare; Jena University Hospital, Anesthesiology and Intensive Care</p> |
| <b>Primary Subject Heading</b>: | Intensive care                                                                                                                                                                                                                                                                                                                                                                                                                                                                                                                                                                                                                                                                                                                                                                                                                                                                                                                                                                                                                                                                                                                                                                                                                                                                                                                                                                                                                                                                                                                                                                                                                                                                                             |
| Secondary Subject Heading:      | Infectious diseases                                                                                                                                                                                                                                                                                                                                                                                                                                                                                                                                                                                                                                                                                                                                                                                                                                                                                                                                                                                                                                                                                                                                                                                                                                                                                                                                                                                                                                                                                                                                                                                                                                                                                        |
| Keywords:                       | INTENSIVE & CRITICAL CARE, CHEMOTHERAPY, INFECTIOUS DISEASES                                                                                                                                                                                                                                                                                                                                                                                                                                                                                                                                                                                                                                                                                                                                                                                                                                                                                                                                                                                                                                                                                                                                                                                                                                                                                                                                                                                                                                                                                                                                                                                                                                               |
|                                 |                                                                                                                                                                                                                                                                                                                                                                                                                                                                                                                                                                                                                                                                                                                                                                                                                                                                                                                                                                                                                                                                                                                                                                                                                                                                                                                                                                                                                                                                                                                                                                                                                                                                                                            |



1  
2  
3  
4  
5  
6  
7  
8  
9  
10  
11  
12  
13  
14  
15  
16  
17  
18  
19  
20  
21  
22  
23  
24  
25  
26  
27  
28  
29  
30  
31  
32  
33  
34  
35  
36  
37  
38  
39  
40  
41  
42  
43  
44  
45  
46  
47  
48  
49  
50  
51  
52  
53  
54  
55  
56  
57  
58  
59  
60

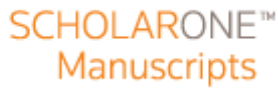

# Epirubicin for the Treatment of Sepsis & Septic Shock (EPOS-1): study protocol for a randomized, placebo-controlled Phase IIa dose escalation trial

Daniel Thomas-Rüddel <sup>1</sup>, Michael Bauer <sup>1</sup>, Luís Ferreira Moita <sup>2</sup>, Christiane Helbig <sup>3</sup>, Peter Schlattmann <sup>4</sup>, Johannes Ehler <sup>1</sup>, Tim Rahmel <sup>5</sup>, Patrick Meybohm <sup>6</sup>, Matthias Gründling <sup>7</sup>, Heiko Schenk <sup>8</sup>, Thomas Köcher <sup>9</sup>, Frank Brunkhorst <sup>1</sup>, Markus Gräler <sup>1</sup>, Ann-Julika Heger <sup>3</sup>, and Sebastian Weis <sup>1,10,11\*</sup>, EPOS-1 study group, SepNet Critical Care Trials Group

<sup>1</sup> Department of Anesthesiology and Intensive Care Medicine, Jena University Hospital, Friedrich-Schiller-University, Jena, Germany

<sup>2</sup> Innate Immunity and Inflammation Laboratory, Instituto Gulbenkian de Ciência, 2780-156 Oeiras, Portugal and Faculdade de Medicina da Universidade de Lisboa, Lisboa, Portugal

<sup>3</sup> Center for Clinical Studies, Jena University Hospital, Friedrich-Schiller-University, 07747 Jena, Germany

<sup>4</sup> Institute of Medical Statistics, Computer Sciences, and Data Science, Jena University Hospital, Friedrich-Schiller-University, 07747 Jena, Germany

<sup>5</sup> Clinic for Anesthesiology, Intensive Care and Pain Therapy, University Medical Center Knappschaftskrankenhaus Bochum, 44892 Bochum, Germany

<sup>6</sup> University Hospital Würzburg, Department of Anaesthesiology, Intensive Care, Emergency and Pain Medicine, 97080 Würzburg, Germany

<sup>7</sup> Department of Anesthesiology, University Hospital of Greifswald, Greifswald, Germany.

<sup>8</sup> Department of Nephrology and Hypertension, Hannover Medical School, Hannover, Germany.

<sup>9</sup> Metabolomics Facility, Vienna BioCenter Core Facilities GmbH; Dr. Bohr-Gasse 3; 1030 Wien, Österreich

<sup>10</sup> Institute for Infectious Disease and Infection Control, Jena University Hospital, Friedrich-Schiller-University 07747 Jena, Germany

<sup>11</sup> Leibniz Institute for Infection Biology and Natural Products Research, Hans-Knöll Institute-HKI, Jena, Germany

**Running Head**  
EPOS-1

## Keywords

Sepsis, disease tolerance, epirubicin

## Word Count

Main: 3404/4000, All without references: 3941/4000

## Corresponding Author

Dr. Sebastian Weis, MD

Institute for Infectious Disease and Infection Control

Department of Anesthesiology and Intensive Care Medicine

Jena University Hospital, Friedrich-Schiller University

Am Klinikum 1

Jena 07749, Germany

Leibniz Institute for Natural Product Research and Infection Biology, Hans Knöll Institute (HKI)

Phone: +49.3641.923-100

Email: [Sebastian.weis@med.uni-jena.de](mailto:Sebastian.weis@med.uni-jena.de)

Epos-1 study group collaborators:

Jena: Frank Bloos, Karen Dlubatz, Stefan Hagel, Jakob Hammersen, Thomas Lehmann, Katja Leonhardt, René Markgraf, Matthias Michael, Florian Reißner, Franziska Röstel, Johannes Roth, Ulrike Schumacher, Nicole Schwarze, Mariann Städtler, Wolfgang Vivas-Varela

Greifswald: Christian Fuchs, Andreas Greinacher, Sven-Olaf Kuhn

Bochum: Andre Hagedorn, Matthias Unterberg, Andrea Wittkowski,

Würzburg: Florian Rumpf, Tobias Haas, Philipp Helmer, Sebastian Hottenrott, Eva Kranke, Peter Kranke, Marianne Neuf, Anke Reppchen, Daniel Röder.

Hannover: Julius Schmidt

## ABSTRACT

**Introduction:** Sepsis remains the major cause of death among hospitalized patients in intensive care. While targeting sepsis-causing pathogens with source control or antimicrobials has had a dramatic impact on morbidity and mortality of sepsis patients, this strategy-remains insufficient for about one-third of the affected individuals that still succumb. Pharmacological targeting of mechanisms that reduce sepsis-defining organ dysfunction may be beneficial. When given at low doses, the anthracycline epirubicin promotes tissue damage control and lessened severity of sepsis independently of the host-pathogen load by conferring disease tolerance to infection. Since epirubicin at higher doses can be myelotoxic, a first dose response trial is necessary to assess the potential harm of this drug in this new indication.

**Methods and analysis:** EPOS-1 is a randomized, double-blind, placebo-controlled phase 2 dose-escalation phase IIa clinical trial to assess the safety of epirubicin as an adjunctive in patients with sepsis. The primary endpoint is the 14-day myelotoxicity. Secondary and explorative outcomes include 30- and 90-day mortality, organ dysfunction, PK/PD, cytokine release. Patients will be randomized in three consecutive phases. For each study phase patients are randomized to one of the two study arms (epirubicin or placebo) in a 4:1 ratio. Approximately 45 patients will be recruited. Patients in the epirubicin group will receive a single dose of epirubicin (3.75 mg/m<sup>2</sup>, 7.5 mg/m<sup>2</sup> or 15 mg/m<sup>2</sup> depending on study phase. After each

1  
2 study phase, a DSMB will recommend continuation or premature stopping of the trial. The  
3 primary analyses for each dose level will report the proportion of myelotoxicity together with a  
4 95% confidence interval. A potential dose-toxicity association will be analyzed using a logistic  
5 regression model with dose as covariate. All further analyses will be descriptive.  
6  
7

8 **Ethics and dissemination:** The protocol is approved by the German Federal Institute for  
9 Drugs and Medical Devices. The results will be submitted for publication in peer-reviewed  
10 journals.  
11

12 **Trial registration:** Clinicaltrials.gov NCT05033808, Protocol Version V6.0  
13  
14

## 15 16 **STRENGTHS AND LIMITATIONS OF THIS STUDY**

- 17 • EPOS-1 the first randomized, placebo-controlled, double-blind, trial that  
18 pharmacologically targets a disease tolerance mechanism.
- 19 • Epirubicin will be repurposed with another concentration in a new indication.
- 20 • This trial is not powered to assess an effect on mortality.
- 21 • Patients are included up to 48 hours after sepsis diagnosis. While this time window  
22 was long enough to decrease disease severity in mice, it is not clear whether it will  
23 be sufficient in humans.
- 24 • Protective effects were shown for bacterial sepsis in previously healthy young  
25 animals. Comorbidity and age on epirubicin metabolism in sepsis could influence  
26 the effects of epirubicin in patients with sepsis.  
27  
28  
29  
30  
31  
32

## 33 **INTRODUCTION**

34  
35 Sepsis is defined as life-threatening organ dysfunction caused by a dysregulated host  
36 response to infection (1). Despite improvement in outcomes mortality still ranges from 15-25%  
37 and can be as high as 50% in case of septic shock (2). Treatment relies on infection control by  
38 antibiotics and source control and supportive therapy, e.g. by fluid resuscitation, vasopressors,  
39 respiratory support, or dialysis. Sepsis mortality rates have not decreased substantially over  
40 the recent years, and new treatment strategies are scarce. Targeting the immune system has  
41 mainly failed (3), potentially due to the syndromic nature of sepsis and the wide variety of  
42 clinical presentations. Immunophenotyping (4) and subsequent personalized immunotherapy  
43 are currently deployed in clinical trials that include patients presenting only with extreme  
44 phenotypes such as immunosuppression or hyperinflammation (5, 6, 7). Yet, for the common  
45 sepsis denominator, *i.e.* organ dysfunction (8), no effective sepsis-specific treatments are  
46 established in clinical practice (2, 9). Noteworthy, the strategies that have been deployed to  
47 decrease specifically infectious disease mortality all share the same mode of action, *i.e.* the  
48 reduction of pathogen burden. This strategy is essentially also used by the immune system  
49 and in this context referred to as “resistance to infection” (10, 11, 12). Another defense strategy  
50 termed “disease tolerance to infection” has not been explored pharmacologically in medicine  
51 (13). In experimental models, this defense strategy has been shown to decrease disease  
52 severity by supporting host homeostasis by limiting the extent of tissue damage associated  
53 with infection and promoting its repair (10, 11, 14). It is achieved using genetically encoded  
54 and evolutionarily conserved stress and damage response mechanisms (14). Anthracyclines,  
55  
56  
57  
58  
59  
60

1  
2 a class of drugs used in chemotherapy for over 30 years (15, 16, 17, 18), have been shown to  
3 enhance disease tolerance when given in low doses (19).

4 Notably, it has been shown that epirubicin increases survival in animal models of sepsis. This  
5 effect was not associated with a decrease in pathogen loads of the infected organism (19).  
6 This indicates that application of epirubicin would act in a way to enforce disease tolerance  
7 mechanisms. Further data shows that epirubicin activated the DNA damage response  
8 pathways in cells, rendering them less susceptible to infection-associated stress (19). Survival  
9 benefits prevailed when epirubicin was administered 24 hours after sepsis induction (19). This  
10 makes epirubicin a potential candidate for a new therapeutic option in sepsis. We are not aware  
11 of any studies or case reports that applied anthracyclines for this indication. Epirubicin has  
12 been used at doses up to 30 mg/m<sup>2</sup> without toxicity in earlier studies with cancer patients (20).  
13 This is a higher dosage than what is intended in the EPOS-1 trial. Based on the existing  
14 preclinical evidence, we designed the EPOS-1 trial to test the hypothesis that low-dose  
15 epirubicin is safe in patients with sepsis.  
16  
17  
18  
19  
20

## 21 **METHODS AND ANALYSIS**

22 EPOS-1 is a randomized, placebo-controlled dose escalation phase IIa trial to assess the  
23 safety of a single low dose of epirubicin as an adjunctive therapy for patients with sepsis.  
24 Sepsis is defined following the Sepsis-3 criteria as infection-associated organ dysfunction,  
25 represented by an increase in the Sequential Organ Failure Assessment (SOFA) score of two  
26 points or more (1). The primary endpoint of the study is myelotoxicity at day 14 after application  
27 of epirubicin. Secondary and exploratory endpoints are the rate and level of organ dysfunction,  
28 the pharmacokinetic/pharmacodynamic of epirubicin, the concentration of cytokines in plasma  
29 and the DNA damage in leukocytes and mortality.  
30  
31  
32

### 33 **Study design and setting**

34 The trial will recruit sepsis patients admitted to intensive care (ICU) and intermediate care units  
35 (IMC) in German university hospitals. Patients will be randomized subsequently to three study  
36 phases with increasing doses of epirubicin or placebo in a 4:1 ratio. After each study phase a  
37 safety analysis will occur before the trial with new patients proceeds to the next higher dose.  
38  
39

### 40 **Study population**

41 The study population consists of adult patients ≥18 years of age with sepsis or septic shock,  
42 currently hospitalized at the intensive care unit (ICU) or intermediate care unit (IMC) regardless  
43 where the sepsis was first diagnosed in one of the five participating centers. There are no sex  
44 restrictions or bias. Screening will be performed daily at the respective trial centers to assess  
45 whether eligible subjects are present in the ICUs or IMC. Pregnant or breastfeeding women  
46 are not eligible for participation in this clinical trial. All inclusion and exclusion criteria are listed  
47 in [Box 1](#). Accounting for a mortality of 30% of the study participants, we will include  
48 approximately a total of 15 participants in each phase, corresponding to 3 patients receiving  
49 placebo and 12 the study drug. This will allow for a primary endpoint assessment up to day 14  
50 of two patients in the placebo group and eight patients in the study drug group. Patients will be  
51 recruited in five centers in order to assure adequate enrolment.  
52  
53  
54  
55

### 56 **Trial management**

57 The trial is led by the sponsor representative and coordinating investigator (SW) and his deputy  
58 (DTR). They are supported by the Center for Clinical Studies of Jena University Hospital (ZKS)  
59 (project manager CH), which is responsible for trial management and monitoring the source  
60

1 data. Biosamples are analyzed at the laboratory of the coordinating investigator and in the  
2 laboratories of cooperating partners.

3  
4 The data and safety monitoring board (DSMB) is composed of three external experts (an  
5 intensive care physician, an oncologist, and a statistician). The DSMB is regulated by a  
6 standardized operating procedure. The main function of the DSMB is to monitor the safety of  
7 the study. All Suspected Unexpected Serious Adverse Reaction (SUSARs) and all cases  
8 fulfilling the primary endpoint definition of myelotoxicity will be reported to the data safety  
9 monitoring board (DSMB). Data for interim analysis will be processed and prepared for  
10 presentation and reported to the DSMB if at least two patients in the placebo group and at  
11 least eight patients in the respective epirubicin group have completed the 14-day follow-up.  
12 The DSMB will convene meetings in the context of interim analysis and additional ad hoc  
13 meetings if necessary. Following each meeting, the DMSB will recommend continuation,  
14 modification, or discontinuation of the study based on observed toxicities.  
15  
16  
17  
18

### 19 **Randomization and study procedures**

20 The local pharmacies at each trial site have access to a web-based central randomization  
21 service, which is available 24 hours / 7 days. The randomization list is prepared by an  
22 independent statistician via a computer-based algorithm and is stratified by study center. For  
23 each study phase patients are randomized to one of the two study arms (epirubicin or placebo)  
24 in a 4:1 ratio. A unique patient ID is generated for data collection throughout the trial ([Figure](#)  
25 [1](#)). Patients in the epirubicin group will receive a single dose of epirubicin. The amount of  
26 epirubicin is determined by the study phase. The epirubicin dosage in Phase 1 is 25% of the  
27 dosage applied in the mouse models, *i.e.* 3.75 mg/m<sup>2</sup> that corresponds to approximately 4%  
28 of the epirubicin dosage applied in a single course of chemotherapy. If this dose is safe, it will  
29 be escalated to 7.5 mg/m<sup>2</sup> and finally 15 mg/m<sup>2</sup> which corresponds to approximately 16% of  
30 the dosage applied in chemotherapy. It equals the dose that showed benefit in the mouse  
31 model and would be the dose to use in a future phase III trial. We expect that none of the  
32 applied dosages of epirubicin will increase toxicity in patients with sepsis. We expect that none  
33 of the applied dosages of epirubicin will increase toxicity in patients with sepsis. The highest  
34 dose corresponds to the amount that had beneficial effects in mice (19).  
35  
36  
37

38 The study medication is prepared in the hospital pharmacies of the trial sites by unblinded  
39 personnel and then delivered to the ICU/IMC. Since epirubicin has a typical red color, the study  
40 medication is delivered blinded in colored bags already connected to colored infusion systems.  
41 In addition, the bags will be covered by an opaque light protection pouch. At the trial site, the  
42 infusion system is prefilled with NaCl solution via a side port before connection to the patient's  
43 central line. The transparent parts of the central line are then covered by an opaque towel  
44 before the application of the IMP is started. After administration of the IMP the infusion system  
45 is flushed by normal saline to remove all residues of the IMP before the towel is removed and  
46 the infusion system is disconnected from the patient's infusion line.  
47  
48

49 An overview of the study procedures and assessments is provided in [Supplementary Table 1](#).  
50 Acute physiology data will be documented directly before and at seven visits up to 24 hours  
51 after the Interventional Medical Product (IMP) administration. Plasma will be centrifugated and  
52 stored at -80°C for further analysis. Peripheral Blood Monocytic cells (PBMCs) will be isolated  
53 at the trial sited using a commercially available kit (MACSprep™ PBMC Isolation Kit, Miltenyi  
54 Biotec).  
55  
56

### 57 **Primary endpoint**

58 The general toxicity profile of anthracyclines is well-known and has extensively been studied  
59 in tumor patients (15, 16, 17, 18). Epirubicin (4'-Epi-Doxorubicin) is a less toxic derivate from  
60

1  
2 doxorubicin and differs structurally only in the epimerization of the OH group in position 4 of  
3 the amino-sugar moiety (15). Myelosuppression -which is also used as the toxicity read-out in  
4 EPOS-1- is the major acute dose-limiting toxicity of epirubicin and consists predominantly of  
5 leukopenia and to a lesser extent in thrombocytopenia (15, 16). This would put patients at risk  
6 of developing severe infections. In cancer studies, myelotoxicity is a commonly used outcome  
7 parameter (21, 22, 23). In early studies, no toxicity was observed when epirubicin was  
8 administered as a single dose of 10, 20, or 30 mg/m<sup>2</sup> (20). The maximum tolerated single dose  
9 of epirubicin in tumor patients is suggested to be 150 mg/m<sup>2</sup>. At lower doses of 120 mg/m<sup>2</sup> only  
10 Grade 2 myelotoxicities were observed (24). The nadir of myeloid toxicity occurs between 10  
11 to 14 days after treatment. Therefore, we will closely monitor myelotoxicity (16, 17).

12  
13 Safety, as assessed by myelotoxicity until day 14 after epirubicin application, is the primary  
14 endpoint. It will be determined by automated or manual differential blood count in the  
15 respective Departments of Clinical Chemistry. Blood count will be measured directly before  
16 study drug administration; 24 hours, 2, 3, 5, 7, 10, 12 and 14 days, days after administration  
17 of verum/placebo.

18  
19 Assessing myelotoxicity in sepsis patients can be complicated since leukopenia, neutropenia  
20 and thrombocytopenia (25, 26, 27, 28) are all being observed in a relevant proportion of sepsis  
21 patients. In rare cases this might be a sign of sepsis-induced myelosuppression, but in most  
22 cases, this is caused by increased consumption or sequestration. Immature platelet fraction  
23 (IPF) is a parameter reflecting megakaryocyte activity and is therefore reflecting platelet  
24 production (29). Thrombocytopenia with a normal or elevated IPF is indicative of increased  
25 consumption and turnover with a normal bone marrow function and is a common finding in  
26 sepsis (29, 30). In contrast, thrombocytopenia with a decreased IPF is indicative of a bone  
27 marrow depression. Leukopenia and neutropenia in sepsis are typically present early in the  
28 disease and are followed by normal or elevated leucocyte counts, while neutropenia due to  
29 myelotoxicity is prolonged. Neutropenia and thrombocytopenia in sepsis are not closely  
30 correlated with each other, as the pathophysiological processes are different, while  
31 myelosuppression normally affects all cell types.

32  
33 To differentiate the best possible way between sepsis-associated alterations and “real”  
34 Epirubicin-induced myelotoxicity the primary safety endpoint of myelotoxicity is defined as  
35 follows:

36  
37 Neutropenia of grade 3 or 4 ([Table 1](#)) at two consecutive study visits up to day 14 or  
38 thrombocytopenia of grade 3 or 4 ([Table 1](#)) at two consecutive study visits up to day 14  
39 accompanied by neutropenia or thrombocytopenia of grade 2, 3 or 4 at both study visits and  
40 accompanied by an IPF below 2.5% at one or two of the consecutive study visits ([Figure 2](#))  
41 (31).

### 42 43 44 45 46 47 **Secondary endpoint**

48  
49 Secondary endpoints for safety are cardiotoxicity, assessed by transthoracic  
50 echocardiography 7 days after epirubicin application, the frequency of other typical side effects  
51 (diarrhea, mucositis, alopecia, nausea, and vomiting), and the overall rate of adverse and  
52 severe adverse events. In addition, we will assess the inflammatory response by measuring  
53 serum cytokines, PCT, and CRP. A “success” rate defined as a decrease of procalcitonin  
54 (PCT) serum concentration by 80% or more of its intra-individual peak value or to 0.5 µg/L or  
55 lower within 72 hours after randomization (following the “Stop Antibiotics on Procalcitonin  
56 guidance Study” (SAPS) by de Jong *et al.* (32) will be assessed. For organ function, SOFA on  
57 days of assessment, mean total SOFA, and SOFA changes over time in the participants will  
58 be assessed. We will further assess fluid balance, urine output, need for renal replacement  
59 therapy, paO<sub>2</sub>/FiO<sub>2</sub> ratio, need for respiratory support, and catecholamines and inotropes.  
60

1  
2 Mortality will be assessed at day 14, 28, and 90 after randomization, quality of life will be  
3 assessed at day 90 in survivors by *Short Form 36 Health Questionnaire* (SF-36). Explorative  
4 objectives include pharmacokinetics and pharmacodynamics of epirubicin, by measuring DNA  
5 damage. Effects on inflammatory response will be further assessed by measuring additional  
6 cytokines and additional molecular markers for organ damage will be analyzed. For better  
7 characterization of immune cell composition, thrombocyte numbers and bone marrow function  
8 FACS of PBMCs, Anti-PF4 antibodies and reticulocytes will be assessed.  
9  
10

### 11 **Sample size and Power Considerations**

12 This is an exploratory trial to test safety of low-dose epirubicin in sepsis. It will serve as a pilot  
13 study for a subsequent larger phase II/III trial, in case epirubicin is safe in this indication.

14 Since sepsis patients are potentially more susceptible to side effects and altered drug toxicity,  
15 we base our sample size calculations on data from cancer patients. These receive four times  
16 higher doses of epirubicin (17, 33). Myelotoxicity was observed in cancer patients that received  
17 repetitive courses of epirubicin. Herait *et al.* reported grade 3 to 4 leucopenia in approximately  
18 20% of patients that were treated every 3-4 weeks using a dose of 85 to 90 mg/m<sup>2</sup> epirubicin  
19 (33). In another trial, myelotoxicity grade 3 to 4 using the WHO classification was reported in  
20 14 % of patients receiving 71-75 mg/m<sup>2</sup> every 3 weeks (17).

21 Based on the assumption that the probability of a myelotoxicity is 18% the probability of  
22 observing at least one myelotoxicity out of eight verum-treated patients equals 79.6% based  
23 on a binomial distribution. Thus, a total of 30 (8 x verum vs. 2 x placebo from each phase)  
24 patients that reach the 14-day safety endpoint is required. Assuming a mortality of sepsis  
25 patients of 30%, it is anticipated, that approximately 12 patients in the epirubicin group and 3  
26 patients in the placebo group per phase will need to be included in the study. Dropouts until  
27 day 14 will be replaced until necessary numbers are reached (see [Figure 1](#)).  
28  
29  
30  
31  
32

### 33 **Data collection/data management**

34 Data will be collected on an electronic case report form (CRF) using OpenClinica®  
35 (OpenClinica, LLC, Waltham, MA, USA) by a trained investigator or study assistant at each  
36 respective trial center. Monitoring will be performed by the ZKS Jena to its local standard  
37 operating procedures (SOPs). Monitoring, in general, will be performed on-site. All serious  
38 adverse events (SAEs), whether related or not related to study medication, must be reported  
39 until 90 days after administration of IMP/control. Patients or relatives are contacted on day 28  
40 and day 90 after randomization to obtain the survival status of the participants.

41 The recommendation will be brought to the attention of the competent higher federal authority  
42 and the leading ethics committee as part of the annual safety report or as an urgent safety  
43 measure, if necessary.  
44  
45  
46  
47

### 48 **Statistical analysis**

49 The primary analyses for each dose level will report the proportion of myelotoxicity together  
50 with a 95% confidence interval. A potential dose-toxicity association will be analyzed using a  
51 logistic regression model with dose as covariate. All further analyses for this study will be  
52 descriptive. Data analyses will be provided by treatment and overall if applicable. After first and  
53 second phase, the data safety monitoring board will meet and recommend whether the study  
54 will be stopped, or the next higher dose phase can be initiated. The DSMB will be provided  
55 with the necessary pre-analyzed and raw data. The major stopping rule of the trial will consist  
56 of increased toxicity in epirubicin groups as assessed by myelotoxicity.  
57  
58  
59  
60

### **Ethics and dissemination**



1  
2 The sponsor of the trial is Friedrich Schiller University; Jena, Germany. The trial was approved  
3 by the ethics committee of the Jena University Hospital on 20 December 2021 (2021-2440-  
4 AMG-ff) and the German Health Authorities (BfArM) on 08 November 2021. In addition, the  
5 local ethics committees at each site approved the study protocol and the study competence of  
6 each site. Written informed consent is obtained from all patients or their legal representatives.  
7 If this is not possible before enrolment in due time, the ethics committees have approved a  
8 deferred consent process where the inability to provide consent is confirmed by an  
9 independent physician, and the patient is enrolled without informed consent. As soon as the  
10 legal representative of the patient is available, written informed consent is immediately  
11 obtained; otherwise, the patient is withdrawn from the study and all study procedures are  
12 ended.

13 The trial is governed by the international standards for Good Clinical Practice (GCP) developed  
14 by the International Council for Harmonization of Technical Requirements for Pharmaceuticals  
15 for Human Use (ICH), the Directive 2001/20/EC for clinical trials and General Data Protection  
16 Regulation (GDPR) 679/2016 (EC). Results of the trial will be published in a peer reviewed  
17 journal and reported on [clinicaltrials.org](http://clinicaltrials.org). All publication will be available in open access.

### 22 **Patient and public involvement**

23 Patients or the public were not involved in the design of the EPOS-1 trial. The trial design was  
24 endorsed by the Deutsche Sepsis Gesellschaft.

## 27 **DISCUSSION**

28 Despite tremendous research efforts during the last decades, no specific therapy for sepsis  
29 exists that targets sepsis-associated organ dysfunction (2). Instead, treatment relies on the  
30 timely administration of broad-spectrum antibiotics, mechanical organ support, along with  
31 source control and if necessary organ replacement therapy. Increasing rates of antimicrobial  
32 resistance and lack of innovation of new antimicrobials further add to the problem (2, 9).  
33 Therefore, new therapeutic approaches are urgently needed. In this study for the first time, we  
34 will pharmacologically intend to manipulate disease tolerance to infection, a molecular  
35 mechanism that lessens disease severity by enforcing tissue damage control (34, 35, 36).  
36 Presumably, manipulation of tissue damage control mechanisms will not impose selection  
37 pressure on the pathogens and therefore should not cause anti-microbial resistance to the  
38 applied drugs (14, 37). The primary aim of this study is to demonstrate safety and tolerability  
39 of a low dose of epirubicin in sepsis patients. This drug has recently been shown to induce  
40 disease tolerance and tissue damage control in animal models of sepsis (19, 38).

41 With this randomized-controlled, multicenter trial, we aim to investigate whether the  
42 administration of low-dose epirubicin is safe in patients with sepsis and septic shock. If this  
43 approach proves to be successful, we would be able to provide a sepsis-specific therapy for  
44 the 1<sup>st</sup> time; *i.e.* targeting the deleterious organ failure. This might ultimately also decrease the  
45 rate of antibiotic consumption in the critically ill and improve the anti-microbial resistance rates.  
46 In addition, if epirubicin proves to be safe and beneficial for patients with sepsis, it might also  
47 extend treatment options for patients living in areas with limited resources and high  
48 antimicrobial resistance rates such as in African countries or the Indian subcontinent, amongst  
49 others in which assessment of causing pathogens, determination of antimicrobial resistance  
50 patterns is not available for the majority of patients and in which expensive antibiotics cannot  
51 be applied. The overall treatment algorithm of patients participating in the clinical trial follows

1  
2 the standard practice for this condition and is in accordance with current guidelines for the  
3 treatment of such patients.  
4

5  
6 A drug licensed for chemotherapy will be applied to a highly vulnerable group, *i.e.* patients with  
7 sepsis. Intuitively, this seems to be contraindicated. However, our approach is not intended to  
8 use its chemotherapeutic potency. Instead, its potential to induce damage response  
9 mechanisms will be applied (19). Drug dosages are significantly lower than when applied in a  
10 single chemotherapeutic cycle. Therefore, relevant toxicity is not expected. Close safety  
11 monitoring will be performed, and the major stopping rule of the trial will consist of increased  
12 toxicity in the groups that receive epirubicin. As such, in our opinion, the benefits substantially  
13 outweigh the potential risks in this trial. The first study site was initiated in June 2022 and the  
14 first patient was randomized October 19.2022. Five centers can recruit patients since June  
15 2023. Recruitment is planned to finish by the end of 2024.  
16  
17  
18  
19

## 20 ACKNOWLEDGEMENTS:

21  
22 Contributors: All authors fulfill the ICMJE recommendations for authorships. The roles and  
23 contributions of the individual authors are as follows: Sponsor Representative/Principal and  
24 coordinating investigator: **SW**; Deputy Coordinating Investigator: **DTR**; Project Manager: **CH**;  
25 Protocol writing and planning of the study: **SW, DTR, FB, MB, PS, CH, AH, LFM**; Acquisition  
26 of Funding: **SW, FB, MB**; Formulation of initial hypothesis: **SW, LFM**; Trial statistician, sample  
27 size calculation and statistical analysis plan: **PS**; Molecular analysis: **LFM, MGräl, TK**; Study  
28 Center Coordinators and recruitment of patients: **JE, TR, PM, MG, HS**. All authors contributed  
29 to, read and approved the final manuscript and contributed to the writing.  
30  
31  
32

33 Funding: This investigator-initiated trial is financially supported by *Bundesministerium für*  
34 *Bildung und Forschung* (BMBF) (#01EN2001).  
35

36  
37 Competing interests: **LFM** is an inventor on an international patent (WO 2013/036153)  
38 related to the use of anthacyclines for sepsis treatment. All other authors report no  
39 competing interests  
40  
41

## 42 **REFERENCES**

- 43 1. Singer M, Deutschman CS, Seymour CW, Shankar-Hari M, Annane D, Bauer M, et al.  
44 The Third International Consensus Definitions for Sepsis and Septic Shock (Sepsis-3).  
45 JAMA. 2016;315(8):801-10.  
46
- 47 2. Cohen J, Vincent JL, Adhikari NK, Machado FR, Angus DC, Calandra T, et al. Sepsis:  
48 a roadmap for future research. *Lancet Infect Dis*. 2015;15(5):581-614.  
49
- 50 3. Marshall JC. Why have clinical trials in sepsis failed? *Trends Mol Med*.  
51 2014;20(4):195-203.  
52
- 53 4. Scicluna BP, Klein Klouwenberg PM, van Vught LA, Wiewel MA, Ong DS,  
54 Zwinderman AH, et al. A molecular biomarker to diagnose community-acquired pneumonia  
55 on intensive care unit admission. *Am J Respir Crit Care Med*. 2015;192(7):826-35.  
56
- 57 5. Kotsaki A, Pickkers P, Bauer M, Calandra T, Lupsé M, Wiersinga WJ, et al.  
58 ImmunoSep (Personalised Immunotherapy in Sepsis) international double-blind, double-  
59  
60

- 1  
2 dummy, placebo-controlled randomised clinical trial: study protocol. *BMJ Open*.  
3 2022;12(12):e067251.  
4
- 5 6. Giamarellos-Bourboulis EJ, Aschenbrenner AC, Bauer M, Bock C, Calandra T, Gat-  
6 Viks I, et al. The pathophysiology of sepsis and precision-medicine-based immunotherapy.  
7 *Nat Immunol*. 2024;25(1):19-28.  
8
- 9 7. Bode C, Weis S, Sauer A, Wendel-Garcia P, David S. Targeting the host response in  
10 sepsis: current approaches and future evidence. *Crit Care*. 2023;27(1):478.  
11
- 12 8. Bauer M, Coldewey SM, Leitner M, Loffler B, Weis S, Wetzker R. Deterioration of  
13 Organ Function As a Hallmark in Sepsis: The Cellular Perspective. *Front Immunol*.  
14 2018;9:1460.  
15
- 16 9. Angus DC, van der Poll T. Severe sepsis and septic shock. *N Engl J Med*.  
17 2013;369(9):840-51.  
18
- 19 10. Medzhitov R, Schneider DS, Soares MP. Disease Tolerance as a Defense Strategy.  
20 *Science*. 2012;335:936-41.  
21
- 22 11. Soares MP, Teixeira L, Moita LF. Disease tolerance and immunity in host protection  
23 against infection. *Nat Rev Immunol*. 2017.  
24
- 25 12. Bauer M, Shankar-Hari M, Thomas-Ruddel DO, Wetzker R. Towards an ecological  
26 definition of sepsis: a viewpoint. *Intensive Care Med Exp*. 2021;9(1):63.  
27
- 28 13. Powell RE, Soares MP, Weis S. What's new in intensive care: disease tolerance.  
29 *Intensive Care Med*. 2023;49(10):1235-7.  
30
- 31 14. Soares MP, Gozzelino R, Weis S. Tissue damage control in disease tolerance.  
32 *Trends Immunol*. 2014;35(10):483-94.  
33
- 34 15. Plosker GL, Faulds D. Epirubicin. A review of its pharmacodynamic and  
35 pharmacokinetic properties, and therapeutic use in cancer chemotherapy. *Drugs*.  
36 1993;45(5):788-856.  
37
- 38 16. Robert J. Epirubicin. Clinical pharmacology and dose-effect relationship. *Drugs*.  
39 1993;45 Suppl 2:20-30.  
40
- 41 17. Ganzina F, Di Pietro N, Magni O. Clinical toxicity of 4'-epi-doxorubicin (epirubicin).  
42 *Tumori*. 1985;71(3):233-40.  
43
- 44 18. Ryberg M, Nielsen D, Skovsgaard T, Hansen J, Jensen BV, Dombernowsky P.  
45 Epirubicin cardiotoxicity: an analysis of 469 patients with metastatic breast cancer. *J Clin*  
46 *Oncol*. 1998;16(11):3502-8.  
47
- 48 19. Figueiredo N, Chora A, Raquel H, Pejanovic N, Pereira P, Hartleben B, et al.  
49 Anthracyclines induce DNA damage response-mediated protection against severe sepsis.  
50 *Immunity*. 2013;39(5):874-84.  
51
- 52 20. Ganzina F. 4'-epi-doxorubicin, a new analogue of doxorubicin: a preliminary overview  
53 of preclinical and clinical data. *Cancer Treat Rev*. 1983;10(1):1-22.  
54
- 55 21. Mross K, Bohn C, Edler L, Jonat W, Queisser W, Heidemann E, et al. Randomized  
56 phase II study of single-agent epirubicin +/- verapamil in patients with advanced metastatic  
57 breast cancer. An AIO clinical trial. Arbeitsgemeinschaft Internistische Onkologie of the  
58 German Cancer Society. *Ann Oncol*. 1993;4(1):45-50.  
59  
60

- 1  
2 22. Calero F, Rodriguez-Escudero F, Jimeno J, Mendana J, Iglesias J, Murillo F, et al.  
3 Single agent epirubicin in squamous cell cervical cancer. A phase II trial. *Acta Oncol.*  
4 1991;30(3):325-7.  
5
- 6 23. Jakobsen P, Bastholt L, Dalmark M, Pfeiffer P, Petersen D, Gjedde SB, et al. A  
7 randomized study of epirubicin at four different dose levels in advanced breast cancer.  
8 Feasibility of myelotoxicity prediction through single blood-sample measurement. *Cancer*  
9 *Chemother Pharmacol.* 1991;28(6):465-9.  
10
- 11 24. Case DC, Jr., Gams R, Ervin TJ, Boyd MA, Oldham FB. Phase I-II trial of high-dose  
12 epirubicin in patients with lymphoma. *Cancer Res.* 1987;47(23):6393-6.  
13
- 14 25. Venkata C, Kashyap R, Farmer JC, Afessa B. Thrombocytopenia in adult patients  
15 with sepsis: incidence, risk factors, and its association with clinical outcome. *J Intensive*  
16 *Care.* 2013;1(1):9.  
17
- 18 26. Vandijck DM, Blot SI, De Waele JJ, Hoste EA, Vandewoude KH, Decruyenaere JM.  
19 Thrombocytopenia and outcome in critically ill patients with bloodstream infection. *Heart*  
20 *Lung.* 2010;39(1):21-6.  
21
- 22 27. Tsigotou P, Chondropoulos S, Frantzeskaki F, Stamouli M, Gkirkas K, Bartzeliotou A,  
23 et al. Thrombocytopenia in critically ill patients with severe sepsis/septic shock: Prognostic  
24 value and association with a distinct serum cytokine profile. *J Crit Care.* 2016;32:9-15.  
25
- 26 28. Sharma B, Sharma M, Majumder M, Steier W, Sangal A, Kalwar M.  
27 Thrombocytopenia in septic shock patients--a prospective observational study of incidence,  
28 risk factors and correlation with clinical outcome. *Anaesth Intensive Care.* 2007;35(6):874-80.  
29
- 30 29. Jeon K, Kim M, Lee J, Lee JS, Kim HS, Kang HJ, et al. Immature platelet fraction: A  
31 useful marker for identifying the cause of thrombocytopenia and predicting platelet recovery.  
32 *Medicine (Baltimore).* 2020;99(7):e19096.  
33
- 34 30. Park SH, Ha SO, Cho YU, Park CJ, Jang S, Hong SB. Immature platelet fraction in  
35 septic patients: clinical relevance of immature platelet fraction is limited to the sensitive and  
36 accurate discrimination of septic patients from non-septic patients, not to the discrimination of  
37 sepsis severity. *Ann Lab Med.* 2016;36(1):1-8.  
38
- 39 31. Kurtin S. Myeloid toxicity of cancer treatment. *J Adv Pract Oncol.* 2012;3(4):209-24.  
40
- 41 32. de Jong E, van Oers JA, Beishuizen A, Vos P, Vermeijden WJ, Haas LE, et al.  
42 Efficacy and safety of procalcitonin guidance in reducing the duration of antibiotic treatment  
43 in critically ill patients: a randomised, controlled, open-label trial. *Lancet Infect Dis.*  
44 2016;16(7):819-27.  
45
- 46 33. Herait P, Poutignat N, Marty M, Bugat R. Early assessment of a new anticancer drug  
47 analogue--are the historical comparisons obsolete? The French experience with pirarubicin.  
48 *Eur J Cancer.* 1992;28A(10):1670-6.  
49
- 50 34. Jamieson AM, Pasman L, Yu S, Gamradt P, Homer RJ, Decker T, et al. Role of tissue  
51 protection in lethal respiratory viral-bacterial coinfection. *Science.* 2013;340(6137):1230-4.  
52
- 53 35. Larsen R, Gozzelino R, Jeney V, Tokaji L, Bozza FA, Japiassu AM, et al. A central  
54 role for free heme in the pathogenesis of severe sepsis. *Sci Transl Med.* 2010;2(51):51ra71.  
55
- 56 36. Weis S, A.R. C, Moita RM, Singh S, Blankenhaus B, Cardoso S, et al. Metabolic  
57 Adaptation established Disease Tolerance to Sepsis. *CELL.* 2017;169:1-13.  
58  
59  
60

1  
2 37. Read AF, Graham AL, Raberg L. Animal defenses against infectious agents: is  
3 damage control more important than pathogen control. PLoS Biol. 2008;6(12):e4.  
4

5 38. Rialdi A, Campisi L, Zhao N, Lagda AC, Pietzsch C, Ho JS, et al. Topoisomerase 1  
6 inhibition suppresses inflammatory genes and protects from death by inflammation. Science.  
7 2016.  
8  
9  
10  
11  
12  
13  
14  
15  
16  
17  
18  
19  
20  
21  
22  
23  
24  
25  
26  
27  
28  
29  
30  
31  
32  
33  
34  
35  
36  
37  
38  
39  
40  
41  
42  
43  
44  
45  
46  
47  
48  
49  
50  
51  
52  
53  
54  
55  
56  
57  
58  
59  
60

For peer review only

## FIGURES AND TABLES

**Box 1:** Inclusion and exclusion criteria of the EPOS-1 trial.

| <b>Inclusion Criteria</b>                                                                                                                                                                                          |
|--------------------------------------------------------------------------------------------------------------------------------------------------------------------------------------------------------------------|
| Patients $\geq 18$ years with sepsis or septic shock, currently hospitalized at the ICU or IMC regardless where the sepsis was first diagnosed.                                                                    |
| Sepsis diagnosis within 48 hours prior to screening regardless of site of infection (defined as increase SOFA score of $\geq 2$ points)                                                                            |
| Informed consent of patient or their legal representative or if not possible a statement by an independent physician                                                                                               |
| <b>Exclusion criteria</b>                                                                                                                                                                                          |
| Leukopenia/Neutropenia/Thrombocytopenia-prior or upon inclusion (Leukocyte Count $< 4,000/\mu\text{L}$ ; Neutrophil/Thrombocyte Count below Lower Limit of Normal)                                                 |
| Weight $> 135$ kg/BMI $> 45$ .                                                                                                                                                                                     |
| Ongoing or History of chemotherapy.                                                                                                                                                                                |
| Hypersensitivity to epirubicin.                                                                                                                                                                                    |
| History of bone marrow or solid organ transplantation.                                                                                                                                                             |
| Immunosuppressive therapy.                                                                                                                                                                                         |
| Acute severe infection within 4 weeks prior to admission (Hospitalization for an infection or in case of hospital acquired infection transfer to a higher level of care due to the infection)                      |
| Chronic infection.                                                                                                                                                                                                 |
| Cardiomyopathy with a documented ejection fraction $< 30\%$ or ICD implantation.                                                                                                                                   |
| Acute liver failure following the European Association for the Study of the Liver definition as International Normalized Ratio (INR) $> 1.5$ and elevation of transaminases $> 3$ times of the upper normal limit. |
| Pregnancy during all trimester/breast-feeding.                                                                                                                                                                     |
| Chronic mechanical ventilation dependency.                                                                                                                                                                         |
| Cystic fibrosis.                                                                                                                                                                                                   |
| Concomitant medication with Verapamil or Cimetidine.                                                                                                                                                               |
| Prior enrollment in this study.                                                                                                                                                                                    |
| Participation in another clinical intervention trial.                                                                                                                                                              |

**Figure 1:** Study design of the EPOS-1 trial. Black bordered circles indicate minimal participants for the safety analysis. Red bordered circles indicate patients that were randomized and received the study drug or placebo are expected not to reach the 14-day safety endpoint considering sepsis-related mortality of up to 30%. Assessment indicates a safety assessment of the DSMB and a study continuation or stop following their recommendation.

Abbreviation: Epi.. epirubicin, hrs.. hours.

**Figure 2:** Flow chart that is used to determine the primary endpoint, *i.e.* myelotoxicity in the EPOS-1 trial. \* for visit Day 2 the previous visit to be considered is Day 0-24 hrs.

Abbreviation: hrs.. hours

**Table 1:** Grading of neutropenia and thrombocytopenia.

|                | <b>Neutropenia</b> (acute neutrophil count) | <b>Thrombocytopenia</b> (platelets)    |
|----------------|---------------------------------------------|----------------------------------------|
| <b>Grade 1</b> | <Lower limit of normal- 1,500/ $\mu$ L      | <Lower limit of normal-75,000/ $\mu$ L |
| <b>Grade 2</b> | <1,500-1,000/ $\mu$ L                       | <75,000-50,000/ $\mu$ L                |
| <b>Grade 3</b> | <1,000-500/ $\mu$ L                         | <50,000-25,000/ $\mu$ L                |
| <b>Grade 4</b> | < 500/ $\mu$ L                              | < 25,000/ $\mu$ L                      |

1  
2  
3  
4  
5  
6  
7  
8  
9  
10  
11  
12  
13  
14  
15  
16  
17  
18  
19  
20  
21  
22  
23  
24  
25  
26  
27  
28  
29  
30  
31  
32  
33  
34  
35  
36  
37  
38  
39  
40  
41  
42  
43  
44  
45  
46  
47  
48  
49  
50  
51  
52  
53  
54  
55  
56  
57  
58  
59  
60

● Placebo    ●●● Epirubicin

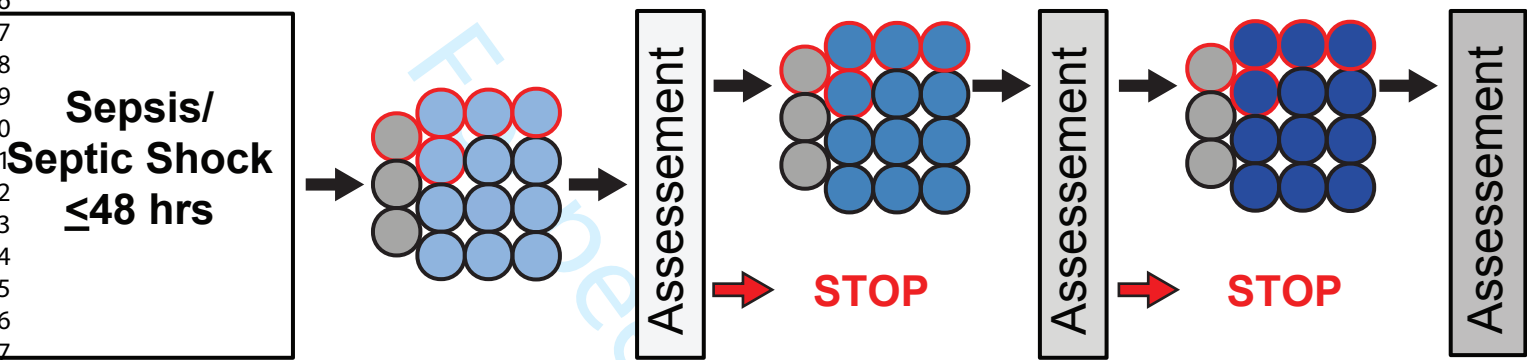

In-/Exclusion | 3.75 mg/m<sup>2</sup> Epi | 7.5 mg/m<sup>2</sup> Epi | 15 mg/m<sup>2</sup> Epi



1  
2  
3  
4  
5  
6  
7  
8  
9  
10  
11  
12  
13  
14  
15  
16  
17  
18  
19  
20  
21  
22  
23  
24  
25  
26  
27  
28  
29  
30  
31  
32  
33  
34  
35  
36  
37  
38  
39  
40  
41  
42  
43  
44  
45  
46  
47  
48  
49  
50  
51  
52  
53  
54  
55  
56  
57  
58  
59  
60

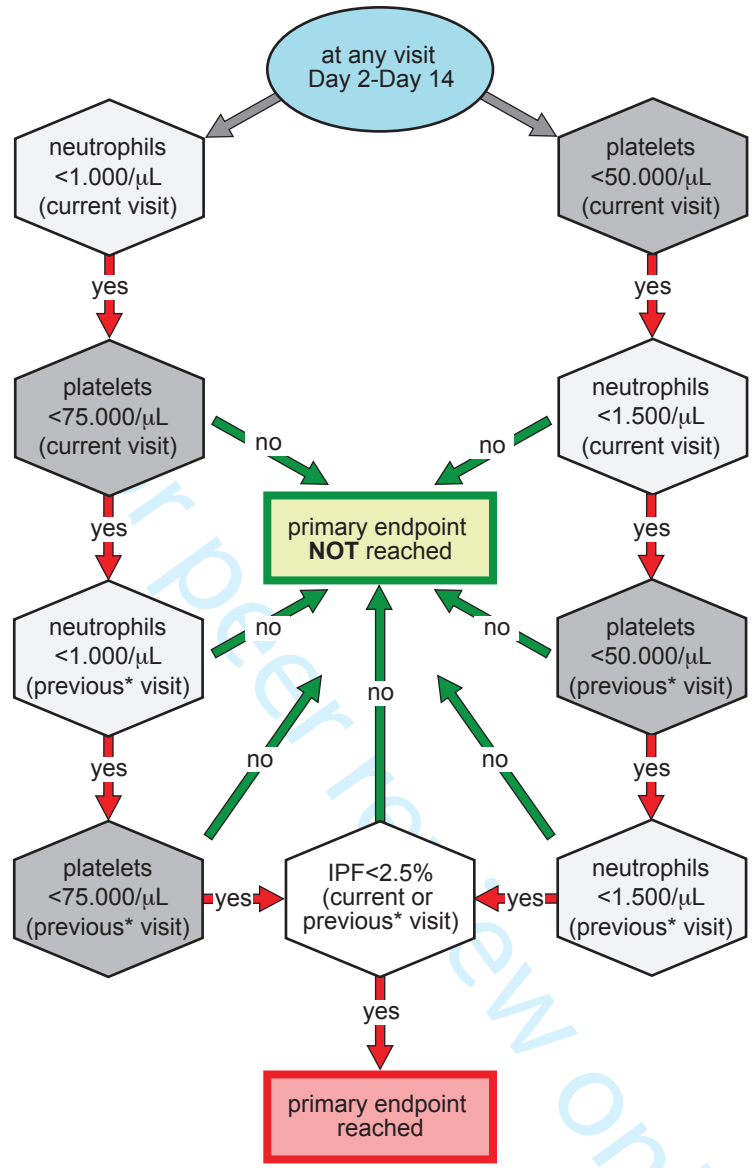

**Supplementary Table 1: Study procedures and visits.**

| Time (Days)                              | Pre | D0<br>First 24 hours |    |      |        |       |     |      |      | D1  | D2   | D3 | D5 | D7 | D10 | D12  | D14 | D28±2 | D90±4 |      |
|------------------------------------------|-----|----------------------|----|------|--------|-------|-----|------|------|-----|------|----|----|----|-----|------|-----|-------|-------|------|
| Time (Min)                               |     | 0                    | 15 | 60±5 | 120±10 |       |     |      |      |     |      |    |    |    |     |      |     |       |       |      |
| Time (hours)                             |     |                      |    | 1    | 2      | 3±0,5 | 6±1 | 12±2 | 24±4 |     |      |    |    |    |     |      |     |       |       |      |
| Visit                                    |     | B                    | 0  | I    | II     | III   | IV  | V    | VI   | VII | VIII | IX | X  | XI | XII | XIII | XIV | XV    | XVI   | XVII |
| Inclusion/Exclusion Criteria             | X   |                      |    |      |        |       |     |      |      |     |      |    |    |    |     |      |     |       |       |      |
| Written Informed Consent                 | X   |                      |    |      |        |       |     |      |      |     |      |    |    |    |     |      |     |       |       |      |
| Pregnancy Test <sup>1</sup>              | X   |                      |    |      |        |       |     |      |      |     |      |    |    |    |     |      |     |       |       |      |
| Randomization                            | X   |                      |    |      |        |       |     |      |      |     |      |    |    |    |     |      |     |       |       |      |
| Baseline Assessment                      | X   |                      |    |      |        |       |     |      |      |     |      |    |    |    |     |      |     |       |       |      |
| SOFA                                     | X   |                      |    |      |        |       |     |      |      |     | X    | X  | X  | X  | X   | X    | X   | X     |       |      |
| SAPS II / qSOFA                          | X   |                      |    |      |        |       |     |      |      |     |      |    |    |    |     |      |     |       |       |      |
| Clinical parameters                      | X   |                      |    |      |        |       |     |      |      |     | X    | X  | X  | X  | X   | X    | X   | X     |       |      |
| Routine laboratory                       | X   |                      |    |      |        |       |     |      |      |     | X    | X  | X  | X  | X   | X    | X   | X     |       |      |
| Treatment parameters on the ICU/IMC      | X   |                      |    |      |        |       |     |      |      |     | X    | X  | X  | X  | X   | X    | X   | X     |       |      |
| Application of study drug                | X   |                      |    |      |        |       |     |      |      |     |      |    |    |    |     |      |     |       |       |      |
| Acute physiology                         |     | X                    | X  | X    | X      | X     | X   | X    | X    | X   |      |    |    |    |     |      |     |       |       |      |
| Plasma sampling                          |     | X                    | X  | X    | X      | X     | X   | X    | X    |     | X    | X  | X  | X  |     |      |     | X     |       |      |
| PBMC sampling                            |     | X                    |    |      |        |       | X   |      | X    |     |      | X  |    | X  |     |      |     |       |       |      |
| Urine sampling                           |     | X                    |    |      |        |       |     |      | X    |     |      | X  |    |    |     |      |     |       |       |      |
| Differential Blood Count/Neutrophils/IPF |     | X                    |    |      |        |       |     |      | X    |     | X    | X  | X  | X  | X   | X    | X   |       |       |      |
| Anti-PF4                                 |     | X                    |    |      |        |       |     |      |      |     |      |    |    | X  |     |      |     | X     |       |      |
| AE / SAE                                 |     |                      | X  | X    | X      | X     | X   | X    | X    | X   | X    | X  | X  | X  | X   | X    | X   | X     | X     | X    |
| Echocardiography                         |     |                      |    |      |        |       |     |      |      |     |      |    |    | X  |     |      |     |       |       |      |
| Survival                                 |     |                      |    |      |        |       |     |      |      |     |      |    |    |    |     |      |     | X     | X     | X    |
| SF-36                                    |     |                      |    |      |        |       |     |      |      |     |      |    |    |    |     |      |     |       |       | X    |

<sup>1</sup>blood or urine

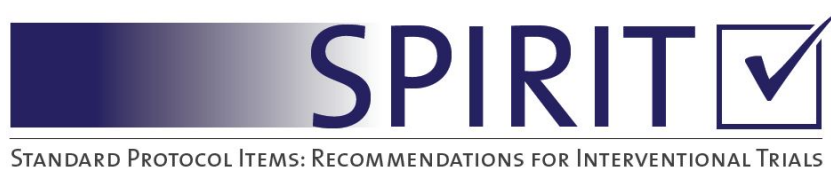

SPIRIT 2013 Checklist: Recommended items to address in a clinical trial protocol and related documents\*

| Section/item                      | Item No | Description                                                                                                                                                                                                                                                                              | Page |
|-----------------------------------|---------|------------------------------------------------------------------------------------------------------------------------------------------------------------------------------------------------------------------------------------------------------------------------------------------|------|
| <b>Administrative information</b> |         |                                                                                                                                                                                                                                                                                          |      |
| Title                             | 1       | Descriptive title identifying the study design, population, interventions, and, if applicable, trial acronym                                                                                                                                                                             | 1    |
| Trial registration                | 2a      | Trial identifier and registry name. If not yet registered, name of intended registry                                                                                                                                                                                                     | 3    |
|                                   | 2b      | All items from the World Health Organization Trial Registration Data Set                                                                                                                                                                                                                 | 3    |
| Protocol version                  | 3       | Date and version identifier                                                                                                                                                                                                                                                              | 3    |
| Funding                           | 4       | Sources and types of financial, material, and other support                                                                                                                                                                                                                              | 9    |
| Roles and responsibilities        | 5a      | Names, affiliations, and roles of protocol contributors                                                                                                                                                                                                                                  | 9    |
|                                   | 5b      | Name and contact information for the trial sponsor                                                                                                                                                                                                                                       | 2    |
|                                   | 5c      | Role of study sponsor and funders, if any, in study design; collection, management, analysis, and interpretation of data; writing of the report; and the decision to submit the report for publication, including whether they will have ultimate authority over any of these activities | 9    |
|                                   | 5d      | Composition, roles, and responsibilities of the coordinating centre, steering committee, endpoint adjudication committee, data management team, and other individuals or groups overseeing the trial, if applicable (see Item 21a for data monitoring committee)                         | 9    |
| <b>Introduction</b>               |         |                                                                                                                                                                                                                                                                                          | 3-4  |
| Background and rationale          | 6a      | Description of research question and justification for undertaking the trial, including summary of relevant studies (published and unpublished) examining benefits and harms for each intervention                                                                                       | 3    |
|                                   | 6b      | Explanation for choice of comparators                                                                                                                                                                                                                                                    | 3    |
| Objectives                        | 7       | Specific objectives or hypotheses                                                                                                                                                                                                                                                        | 4    |
| Trial design                      | 8       | Description of trial design including type of trial (eg, parallel group, crossover, factorial, single group), allocation ratio, and framework (eg, superiority, equivalence, noninferiority, exploratory)                                                                                | 4    |

|    |                                                                     |     |                                                                                                                                                                                                                                                                                                                                                                                |            |
|----|---------------------------------------------------------------------|-----|--------------------------------------------------------------------------------------------------------------------------------------------------------------------------------------------------------------------------------------------------------------------------------------------------------------------------------------------------------------------------------|------------|
| 1  |                                                                     |     |                                                                                                                                                                                                                                                                                                                                                                                |            |
| 2  |                                                                     |     |                                                                                                                                                                                                                                                                                                                                                                                |            |
| 3  |                                                                     |     |                                                                                                                                                                                                                                                                                                                                                                                |            |
| 4  | <b>Methods: Participants, interventions, and outcomes</b>           |     |                                                                                                                                                                                                                                                                                                                                                                                | <b>4-8</b> |
| 5  | Study setting                                                       | 9   | Description of study settings (eg, community clinic, academic hospital) and list of countries where data will be collected. Reference to where list of study sites can be obtained                                                                                                                                                                                             |            |
| 6  |                                                                     |     |                                                                                                                                                                                                                                                                                                                                                                                |            |
| 7  |                                                                     |     |                                                                                                                                                                                                                                                                                                                                                                                |            |
| 8  | Eligibility criteria                                                | 10  | Inclusion and exclusion criteria for participants. If applicable, eligibility criteria for study centres and individuals who will perform the interventions (eg, surgeons, psychotherapists)                                                                                                                                                                                   | 4          |
| 9  |                                                                     |     |                                                                                                                                                                                                                                                                                                                                                                                |            |
| 10 |                                                                     |     |                                                                                                                                                                                                                                                                                                                                                                                |            |
| 11 | Interventions                                                       | 11a | Interventions for each group with sufficient detail to allow replication, including how and when they will be administered                                                                                                                                                                                                                                                     | 4          |
| 12 |                                                                     |     |                                                                                                                                                                                                                                                                                                                                                                                |            |
| 13 |                                                                     | 11b | Criteria for discontinuing or modifying allocated interventions for a given trial participant (eg, drug dose change in response to harms, participant request, or improving/worsening disease)                                                                                                                                                                                 | n.a.       |
| 14 |                                                                     |     |                                                                                                                                                                                                                                                                                                                                                                                |            |
| 15 |                                                                     |     |                                                                                                                                                                                                                                                                                                                                                                                |            |
| 16 |                                                                     | 11c | Strategies to improve adherence to intervention protocols, and any procedures for monitoring adherence (eg, drug tablet return, laboratory tests)                                                                                                                                                                                                                              | n.a.       |
| 17 |                                                                     |     |                                                                                                                                                                                                                                                                                                                                                                                |            |
| 18 |                                                                     |     |                                                                                                                                                                                                                                                                                                                                                                                |            |
| 19 |                                                                     |     |                                                                                                                                                                                                                                                                                                                                                                                |            |
| 20 |                                                                     | 11d | Relevant concomitant care and interventions that are permitted or prohibited during the trial                                                                                                                                                                                                                                                                                  | 13         |
| 21 |                                                                     |     |                                                                                                                                                                                                                                                                                                                                                                                |            |
| 22 | Outcomes                                                            | 12  | Primary, secondary, and other outcomes, including the specific measurement variable (eg, systolic blood pressure), analysis metric (eg, change from baseline, final value, time to event), method of aggregation (eg, median, proportion), and time point for each outcome. Explanation of the clinical relevance of chosen efficacy and harm outcomes is strongly recommended | 5-6        |
| 23 |                                                                     |     |                                                                                                                                                                                                                                                                                                                                                                                |            |
| 24 |                                                                     |     |                                                                                                                                                                                                                                                                                                                                                                                |            |
| 25 |                                                                     |     |                                                                                                                                                                                                                                                                                                                                                                                |            |
| 26 |                                                                     |     |                                                                                                                                                                                                                                                                                                                                                                                |            |
| 27 |                                                                     |     |                                                                                                                                                                                                                                                                                                                                                                                |            |
| 28 | Participant timeline                                                | 13  | Time schedule of enrolment, interventions (including any run-ins and washouts), assessments, and visits for participants. A schematic diagram is highly recommended (see Figure)                                                                                                                                                                                               | 5-6        |
| 29 |                                                                     |     |                                                                                                                                                                                                                                                                                                                                                                                |            |
| 30 |                                                                     |     |                                                                                                                                                                                                                                                                                                                                                                                |            |
| 31 |                                                                     |     |                                                                                                                                                                                                                                                                                                                                                                                |            |
| 32 |                                                                     |     |                                                                                                                                                                                                                                                                                                                                                                                |            |
| 33 |                                                                     |     |                                                                                                                                                                                                                                                                                                                                                                                |            |
| 34 |                                                                     |     |                                                                                                                                                                                                                                                                                                                                                                                |            |
| 35 |                                                                     |     |                                                                                                                                                                                                                                                                                                                                                                                |            |
| 36 | Sample size                                                         | 14  | Estimated number of participants needed to achieve study objectives and how it was determined, including clinical and statistical assumptions supporting any sample size calculations                                                                                                                                                                                          | 4          |
| 37 |                                                                     |     |                                                                                                                                                                                                                                                                                                                                                                                |            |
| 38 |                                                                     |     |                                                                                                                                                                                                                                                                                                                                                                                |            |
| 39 |                                                                     |     |                                                                                                                                                                                                                                                                                                                                                                                |            |
| 40 |                                                                     |     |                                                                                                                                                                                                                                                                                                                                                                                |            |
| 41 | Recruitment                                                         | 15  | Strategies for achieving adequate participant enrolment to reach target sample size                                                                                                                                                                                                                                                                                            | 4          |
| 42 |                                                                     |     |                                                                                                                                                                                                                                                                                                                                                                                |            |
| 43 |                                                                     |     |                                                                                                                                                                                                                                                                                                                                                                                |            |
| 44 |                                                                     |     |                                                                                                                                                                                                                                                                                                                                                                                |            |
| 45 |                                                                     |     |                                                                                                                                                                                                                                                                                                                                                                                |            |
| 46 |                                                                     |     |                                                                                                                                                                                                                                                                                                                                                                                |            |
| 47 |                                                                     |     |                                                                                                                                                                                                                                                                                                                                                                                |            |
| 48 |                                                                     |     |                                                                                                                                                                                                                                                                                                                                                                                |            |
| 49 | <b>Methods: Assignment of interventions (for controlled trials)</b> |     |                                                                                                                                                                                                                                                                                                                                                                                | <b>5</b>   |
| 50 | Allocation:                                                         |     |                                                                                                                                                                                                                                                                                                                                                                                | 5          |
| 51 |                                                                     |     |                                                                                                                                                                                                                                                                                                                                                                                |            |
| 52 | Sequence generation                                                 | 16a | Method of generating the allocation sequence (eg, computer-generated random numbers), and list of any factors for stratification. To reduce predictability of a random sequence, details of any planned restriction (eg, blocking) should be provided in a separate document that is unavailable to those who enrol participants or assign interventions                       | 5          |
| 53 |                                                                     |     |                                                                                                                                                                                                                                                                                                                                                                                |            |
| 54 |                                                                     |     |                                                                                                                                                                                                                                                                                                                                                                                |            |
| 55 |                                                                     |     |                                                                                                                                                                                                                                                                                                                                                                                |            |
| 56 |                                                                     |     |                                                                                                                                                                                                                                                                                                                                                                                |            |
| 57 |                                                                     |     |                                                                                                                                                                                                                                                                                                                                                                                |            |
| 58 |                                                                     |     |                                                                                                                                                                                                                                                                                                                                                                                |            |
| 59 |                                                                     |     |                                                                                                                                                                                                                                                                                                                                                                                |            |
| 60 |                                                                     |     |                                                                                                                                                                                                                                                                                                                                                                                |            |

|    |                                                           |     |                                                                          |            |
|----|-----------------------------------------------------------|-----|--------------------------------------------------------------------------|------------|
| 1  |                                                           |     |                                                                          |            |
| 2  | Allocation                                                | 16b | Mechanism of implementing the allocation sequence (eg, central           | 5          |
| 3  | concealment                                               |     | telephone; sequentially numbered, opaque, sealed envelopes),             |            |
| 4  | mechanism                                                 |     | describing any steps to conceal the sequence until interventions are     |            |
| 5  |                                                           |     | assigned                                                                 |            |
| 6  |                                                           |     |                                                                          |            |
| 7  | Implementation                                            | 16c | Who will generate the allocation sequence, who will enrol participants,  | 5          |
| 8  |                                                           |     | and who will assign participants to interventions                        |            |
| 9  |                                                           |     |                                                                          |            |
| 10 | Blinding                                                  | 17a | Who will be blinded after assignment to interventions (eg, trial         | 5          |
| 11 | (masking)                                                 |     | participants, care providers, outcome assessors, data analysts), and     |            |
| 12 |                                                           |     | how                                                                      |            |
| 13 |                                                           |     |                                                                          |            |
| 14 |                                                           |     |                                                                          |            |
| 15 |                                                           | 17b | If blinded, circumstances under which unblinding is permissible, and     | 5          |
| 16 |                                                           |     | procedure for revealing a participant's allocated intervention during    |            |
| 17 |                                                           |     | the trial                                                                |            |
| 18 |                                                           |     |                                                                          |            |
| 19 |                                                           |     |                                                                          |            |
| 20 | <b>Methods: Data collection, management, and analysis</b> |     |                                                                          | <b>4-7</b> |
| 21 |                                                           |     |                                                                          |            |
| 22 | Data collection                                           | 18a | Plans for assessment and collection of outcome, baseline, and other      | 7          |
| 23 | methods                                                   |     | trial data, including any related processes to promote data quality (eg, |            |
| 24 |                                                           |     | duplicate measurements, training of assessors) and a description of      |            |
| 25 |                                                           |     | study instruments (eg, questionnaires, laboratory tests) along with      |            |
| 26 |                                                           |     | their reliability and validity, if known. Reference to where data        |            |
| 27 |                                                           |     | collection forms can be found, if not in the protocol                    |            |
| 28 |                                                           |     |                                                                          |            |
| 29 |                                                           |     |                                                                          |            |
| 30 |                                                           | 18b | Plans to promote participant retention and complete follow-up,           | 7          |
| 31 |                                                           |     | including list of any outcome data to be collected for participants who  |            |
| 32 |                                                           |     | discontinue or deviate from intervention protocols                       |            |
| 33 |                                                           |     |                                                                          |            |
| 34 | Data                                                      | 19  | Plans for data entry, coding, security, and storage, including any       | 4,7        |
| 35 | management                                                |     | related processes to promote data quality (eg, double data entry;        |            |
| 36 |                                                           |     | range checks for data values). Reference to where details of data        |            |
| 37 |                                                           |     | management procedures can be found, if not in the protocol               |            |
| 38 |                                                           |     |                                                                          |            |
| 39 |                                                           |     |                                                                          |            |
| 40 | Statistical                                               | 20a | Statistical methods for analysing primary and secondary outcomes.        | 7          |
| 41 | methods                                                   |     | Reference to where other details of the statistical analysis plan can be |            |
| 42 |                                                           |     | found, if not in the protocol                                            |            |
| 43 |                                                           |     |                                                                          |            |
| 44 |                                                           | 20b | Methods for any additional analyses (eg, subgroup and adjusted           | 7          |
| 45 |                                                           |     | analyses)                                                                |            |
| 46 |                                                           |     |                                                                          |            |
| 47 |                                                           |     |                                                                          |            |
| 48 |                                                           | 20c | Definition of analysis population relating to protocol non-adherence     | n.a.       |
| 49 |                                                           |     | (eg, as randomised analysis), and any statistical methods to handle      |            |
| 50 |                                                           |     | missing data (eg, multiple imputation)                                   |            |
| 51 |                                                           |     |                                                                          |            |
| 52 | <b>Methods: Monitoring</b>                                |     |                                                                          |            |
| 53 |                                                           |     |                                                                          |            |
| 54 | Data monitoring                                           | 21a | Composition of data monitoring committee (DMC); summary of its role      | 7          |
| 55 |                                                           |     | and reporting structure; statement of whether it is independent from     |            |
| 56 |                                                           |     | the sponsor and competing interests; and reference to where further      |            |
| 57 |                                                           |     | details about its charter can be found, if not in the protocol.          |            |
| 58 |                                                           |     | Alternatively, an explanation of why a DMC is not needed                 |            |
| 59 |                                                           |     |                                                                          |            |
| 60 |                                                           |     |                                                                          |            |

|    |                                 |     |                                                                               |            |
|----|---------------------------------|-----|-------------------------------------------------------------------------------|------------|
| 1  |                                 |     |                                                                               |            |
| 2  |                                 | 21b | Description of any interim analyses and stopping guidelines, including        | 7          |
| 3  |                                 |     | who will have access to these interim results and make the final              |            |
| 4  |                                 |     | decision to terminate the trial                                               |            |
| 5  |                                 |     |                                                                               |            |
| 6  | Harms                           | 22  | Plans for collecting, assessing, reporting, and managing solicited and        | 7          |
| 7  |                                 |     | spontaneously reported adverse events and other unintended effects            |            |
| 8  |                                 |     | of trial interventions or trial conduct                                       |            |
| 9  |                                 |     |                                                                               |            |
| 10 |                                 |     |                                                                               |            |
| 11 | Auditing                        | 23  | Frequency and procedures for auditing trial conduct, if any, and              | 7          |
| 12 |                                 |     | whether the process will be independent from investigators and the            |            |
| 13 |                                 |     | sponsor                                                                       |            |
| 14 |                                 |     |                                                                               |            |
| 15 |                                 |     |                                                                               |            |
| 16 | <b>Ethics and dissemination</b> |     |                                                                               | <b>5-8</b> |
| 17 |                                 |     |                                                                               |            |
| 18 | Research ethics approval        | 24  | Plans for seeking research ethics committee/institutional review board        |            |
| 19 |                                 |     | (REC/IRB) approval                                                            |            |
| 20 |                                 |     |                                                                               |            |
| 21 | Protocol amendments             | 25  | Plans for communicating important protocol modifications (eg,                 | 5          |
| 22 |                                 |     | changes to eligibility criteria, outcomes, analyses) to relevant parties      |            |
| 23 |                                 |     | (eg, investigators, REC/IRBs, trial participants, trial registries, journals, |            |
| 24 |                                 |     | regulators)                                                                   |            |
| 25 |                                 |     |                                                                               |            |
| 26 | Consent or assent               | 26a | Who will obtain informed consent or assent from potential trial               | 8          |
| 27 |                                 |     | participants or authorised surrogates, and how (see Item 32)                  |            |
| 28 |                                 |     |                                                                               |            |
| 29 |                                 | 26b | Additional consent provisions for collection and use of participant data      | 8          |
| 30 |                                 |     | and biological specimens in ancillary studies, if applicable                  |            |
| 31 |                                 |     |                                                                               |            |
| 32 | Confidentiality                 | 27  | How personal information about potential and enrolled participants will       | 8          |
| 33 |                                 |     | be collected, shared, and maintained in order to protect confidentiality      |            |
| 34 |                                 |     | before, during, and after the trial                                           |            |
| 35 |                                 |     |                                                                               |            |
| 36 |                                 |     |                                                                               |            |
| 37 | Declaration of interests        | 28  | Financial and other competing interests for principal investigators for       | 9          |
| 38 |                                 |     | the overall trial and each study site                                         |            |
| 39 |                                 |     |                                                                               |            |
| 40 | Access to data                  | 29  | Statement of who will have access to the final trial dataset, and             | 8          |
| 41 |                                 |     | disclosure of contractual agreements that limit such access for               |            |
| 42 |                                 |     | investigators                                                                 |            |
| 43 |                                 |     |                                                                               |            |
| 44 |                                 |     |                                                                               |            |
| 45 | Ancillary and post-trial care   | 30  | Provisions, if any, for ancillary and post-trial care, and for                | n.a.       |
| 46 |                                 |     | compensation to those who suffer harm from trial participation                |            |
| 47 |                                 |     |                                                                               |            |
| 48 | Dissemination policy            | 31a | Plans for investigators and sponsor to communicate trial results to           | 7          |
| 49 |                                 |     | participants, healthcare professionals, the public, and other relevant        |            |
| 50 |                                 |     | groups (eg, via publication, reporting in results databases, or other         |            |
| 51 |                                 |     | data sharing arrangements), including any publication restrictions            |            |
| 52 |                                 |     |                                                                               |            |
| 53 |                                 |     |                                                                               |            |
| 54 |                                 | 31b | Authorship eligibility guidelines and any intended use of professional        | n.a.       |
| 55 |                                 |     | writers                                                                       |            |
| 56 |                                 |     |                                                                               |            |
| 57 |                                 | 31c | Plans, if any, for granting public access to the full protocol, participant-  | n.a.       |
| 58 |                                 |     | level dataset, and statistical code                                           |            |
| 59 |                                 |     |                                                                               |            |
| 60 |                                 |     |                                                                               |            |

**Appendices**

|                            |    |                                                                                                                                                                                                |   |
|----------------------------|----|------------------------------------------------------------------------------------------------------------------------------------------------------------------------------------------------|---|
| Informed consent materials | 32 | Model consent form and other related documentation given to participants and authorised surrogates                                                                                             | x |
| Biological specimens       | 33 | Plans for collection, laboratory evaluation, and storage of biological specimens for genetic or molecular analysis in the current trial and for future use in ancillary studies, if applicable | x |

---

For peer review only
