# Supplementary material for: Epirubicin for the Treatment of Sepsis and Septic Shock (EPOS-1): study protocol for a randomised, placebo-controlled phase IIa dose-escalation trial
Source: PubMed Central journal article supplement — BMJ Open. 2024 Apr 22;14(4):e075158. doi: 10.1136/bmjopen-2023-075158 (PMC11043739; doi:10.1136/bmjopen-2023-075158), 2024-04-22
Supplement: bmjopen-2023-075158supp001.pdf [file bmjopen-2023-075158supp001.pdf]

**Supplementary Table 1:** Study procedures and visits.

| Time (Days)                              | Pre | D0<br>First 24 hours |    |      |        |       |     |      |      | D1  | D2   | D3 | D5 | D7 | D10 | D12  | D14 | D28±2 | D90±4 |      |
|------------------------------------------|-----|----------------------|----|------|--------|-------|-----|------|------|-----|------|----|----|----|-----|------|-----|-------|-------|------|
| Time (Min)                               |     | 0                    | 15 | 60±5 | 120±10 |       |     |      |      |     |      |    |    |    |     |      |     |       |       |      |
| Time (hours)                             |     |                      |    | 1    | 2      | 3±0,5 | 6±1 | 12±2 | 24±4 |     |      |    |    |    |     |      |     |       |       |      |
| Visit                                    |     | B                    | 0  | I    | II     | III   | IV  | V    | VI   | VII | VIII | IX | X  | XI | XII | XIII | XIV | XV    | XVI   | XVII |
| Inclusion/Exclusion Criteria             | X   |                      |    |      |        |       |     |      |      |     |      |    |    |    |     |      |     |       |       |      |
| Written Informed Consent                 | X   |                      |    |      |        |       |     |      |      |     |      |    |    |    |     |      |     |       |       |      |
| Pregnancy Test <sup>1</sup>              | X   |                      |    |      |        |       |     |      |      |     |      |    |    |    |     |      |     |       |       |      |
| Randomization                            | X   |                      |    |      |        |       |     |      |      |     |      |    |    |    |     |      |     |       |       |      |
| Baseline Assessment                      | X   |                      |    |      |        |       |     |      |      |     |      |    |    |    |     |      |     |       |       |      |
| SOFA                                     | X   |                      |    |      |        |       |     |      |      | X   | X    | X  | X  | X  | X   | X    | X   |       |       |      |
| SAPS II / qSOFA                          | X   |                      |    |      |        |       |     |      |      |     |      |    |    |    |     |      |     |       |       |      |
| Clinical parameters                      | X   |                      |    |      |        |       |     |      |      | X   | X    | X  | X  | X  | X   | X    | X   |       |       |      |
| Routine laboratory                       | X   |                      |    |      |        |       |     |      |      | X   | X    | X  | X  | X  | X   | X    | X   |       |       |      |
| Treatment parameters on the ICU/IMC      | X   |                      |    |      |        |       |     |      |      | X   | X    | X  | X  | X  | X   | X    | X   |       |       |      |
| Application of study drug                | X   |                      |    |      |        |       |     |      |      |     |      |    |    |    |     |      |     |       |       |      |
| Acute physiology                         |     | X                    | X  | X    | X      | X     | X   | X    | X    |     |      |    |    |    |     |      |     |       |       |      |
| Plasma sampling                          |     | X                    | X  | X    | X      | X     | X   | X    | X    |     | X    | X  | X  | X  |     |      |     | X     |       |      |
| PBMC sampling                            |     | X                    |    |      |        |       | X   |      | X    |     |      | X  |    | X  |     |      |     |       |       |      |
| Urine sampling                           |     | X                    |    |      |        |       |     |      | X    |     |      | X  |    |    |     |      |     |       |       |      |
| Differential Blood Count/Neutrophils/IPF |     | X                    |    |      |        |       |     |      | X    |     | X    | X  | X  | X  | X   | X    | X   |       |       |      |
| Anti-PF4                                 |     | X                    |    |      |        |       |     |      |      |     |      |    |    | X  |     |      |     | X     |       |      |
| AE / SAE                                 |     |                      | X  | X    | X      | X     | X   | X    | X    | X   | X    | X  | X  | X  | X   | X    | X   | X     | X     | X    |
| Echocardiography                         |     |                      |    |      |        |       |     |      |      |     |      |    |    | X  |     |      |     |       |       |      |
| Survival                                 |     |                      |    |      |        |       |     |      |      |     |      |    |    |    |     |      | X   | X     | X     |      |
| SF-36                                    |     |                      |    |      |        |       |     |      |      |     |      |    |    |    |     |      |     |       |       | X    |

<sup>1</sup>blood or urine
